# Novel computational method for predicting polytherapy switching strategies to overcome tumor heterogeneity and evolution

Vanessa D. Jonsson<sup>1,†</sup>, Collin M. Blakely<sup>2,3,†</sup>, Luping Lin<sup>2,3</sup>, Saurabh Asthana<sup>2,3</sup>, Victor Olivas<sup>2,3</sup>, Matthew A. Gubens<sup>2,3</sup>, Nikolai Matni<sup>1</sup>, Boris C. Bastian<sup>3,4</sup>, Barry S. Taylor<sup>5,6,7</sup>, John C. Doyle<sup>8,9,10</sup>, and Trever G. Bivona<sup>2,3,11,\*</sup>

<sup>1</sup>Department of Computing and Mathematical Sciences, California Institute of Technology, Pasadena, CA

<sup>2</sup>Department of Medicine, University of California, San Francisco, CA

<sup>3</sup>Helen Diller Family Comprehensive Cancer Center, University of California San Francisco, San Francisco, CA

<sup>4</sup>Department of Pathology, University of California, San Francisco, CA

<sup>5</sup>Human Oncology and Pathogenesis Program, Memorial Sloan Kettering Cancer Center

<sup>6</sup>Department of Epidemiology and Biostatistics, Memorial Sloan Kettering Cancer Center

<sup>7</sup>Marie-Josée and Henry R. Kravis Center for Molecular Oncology, Memorial Sloan Kettering Cancer Center, New York, NY

<sup>8</sup>Department of Control and Dynamical Systems, California Institute of Technology, Pasadena, CA

<sup>9</sup>Department of Electrical Engineering, California Institute of Technology, Pasadena, CA

<sup>10</sup>Department of Biological Engineering, California Institute of Technology, Pasadena, CA

<sup>11</sup>Cellular and Molecular Pharmacology, University of California, San Francisco, CA

<sup>†</sup>co-first authors

\* corresponding author

## 1 Abstract

1 The success of targeted cancer therapy is limited by drug resistance that can result from tumor genetic  
2 heterogeneity. The current approach to address resistance typically involves initiating a new treatment after  
3 clinical/radiographic disease progression, ultimately resulting in futility in most patients. Towards a poten-  
4 tial alternative solution, we developed a novel computational framework that uses human cancer profiling  
5 data to systematically identify dynamic, pre-emptive, and sometimes non-intuitive treatment strategies that  
6 can better control tumors in real-time. By studying lung adenocarcinoma clinical specimens and preclinical  
7 models, our computational analyses revealed that the best anti-cancer strategies addressed existing resistant  
8 subpopulations as they emerged dynamically during treatment. In some cases, the best computed treatment  
9 strategy used unconventional therapy switching while the bulk tumor was responding, a prediction we con-  
10 firmed *in vitro*. The new framework presented here could guide the principled implementation of dynamic  
11 molecular monitoring and treatment strategies to improve cancer control.

## 12 2 Introduction

13 Targeted cancer therapies are effective for the treatment of certain oncogene-driven solid tumors, including  
14 non-small cell lung cancers (NSCLCs) with activating genetic alterations in EGFR (epidermal growth factor  
15 receptor), ALK (anaplastic lymphoma kinase), BRAF, and ROS1 kinases [1, 2, 3]. However, inevitably resis-  
16 tance to current targeted therapies emerges, typically within months of initiating treatment and remains an  
17 obstacle to long-term patient survival [1, 2, 3, 4]. The presence and evolution of tumor genetic heterogeneity  
18 potentially underlies resistance and also limits the response to successive therapeutic regimens that are used  
19 clinically in an attempt to overcome resistance in the tumor after it has emerged [4, 5, 6, 7]. Indeed, while  
20 a targeted therapy may be effective in suppressing one genomic subclone within the tumor, other clones  
21 may be less sensitive to the effects of the drug. Thus, through selective pressures, resistant populations can  
22 emerge and promote tumor progression. Moreover, the current paradigm of solid tumor treatment is largely  
23 based on designing fixed (static) treatment regimens that are deployed sequentially as either initial therapy  
24 or after the clear emergence of drug-resistant disease, detected by clinical and radiographic measures of  
25 tumor progression. In contrast, designing dynamic treatment strategies that switch between targeted agents

26 (or combinations thereof) in real time in order to suppress the outgrowth of rare or emergent drug-resistant  
27 subclones may be a more effective strategy to continually suppress tumor growth and extend the duration of  
28 clinical response. Thus, there is a need to identify principled approaches for the predictive design of effective  
29 combination (poly)therapy strategies to pre-empt the growth of multiple tumor subclones actively during  
30 treatment.

31 Mathematical modeling, analysis and computational simulations of tumor growth, heterogeneity and  
32 inhibition by various therapeutic modalities has long been employed as a method to provide insight into  
33 evolutionary outcomes and effective treatment strategies. Such modeling may include the use of stochastic  
34 [8, 9, 10] or deterministic differential equation implementations [11, 12] to propose static or sequential  
35 treatment strategies that delay resistance in various cancer models. Recent studies by Zhao et al. [13, 14]  
36 incorporate the use of mathematical optimization, a fundamental subject in engineering design to predict  
37 static combination therapies that effectively address heterogeneity in a lymphoma model. Complementary  
38 engineering techniques from optimal control theory provide an additional theoretical framework to design  
39 dynamic drug scheduling regimens in the context of dynamical systems models of cancer heterogeneity and  
40 evolution. The application of optimal control theory to treatment design has a history dating back to the  
41 1970s [15, 16] with more recent examples including that of scheduling angiogenic and chemotherapeutic  
42 agents [17] or immuno- and chemotherapy combinations [18]. While mathematical modeling and engineering  
43 methods have been used extensively to inform treatment strategy design, a significant drawback to prior work  
44 in the field is that the underlying computational framework(s) have not conjointly accomplished the following  
45 important aims: (1) allowing for the systematic principled design of dynamic treatment strategies using  
46 experimentally identified models of tumor dynamic behaviors; and (2) developing quantitative methods that  
47 allow for the exploration of the robustness of predicted treatment strategies with respect to multiple common  
48 challenges in real-world patients, such as tumor heterogeneity and fluctuations in drug concentrations.

49 Here, we present a novel approach that combines a mathematical model of the evolution of tumor cell  
50 populations with parameters identified from our experimental data and an engineering framework for the  
51 systematic design of polytherapy scheduling directed at the following unresolved issues in the field: (1) how  
52 tumor genetic composition and drug dose constraints affect the long term efficacy of combination strategies,

53 (2) how optimal scheduling of combination small molecule inhibitors can help to overcome heterogeneity, ge-  
54 nomic evolution and drug dose fluctuations, and (3) how serial tumor biopsy or blood-based tumor profiling  
55 scheduling in patients can be timed appropriately. To tackle these questions, we developed an integrated  
56 experimental and computational framework that solves for candidate combination treatment strategies and  
57 their scheduling given an initial polyclonal tumor and allows the exploration of treatment design trade offs  
58 such as dosage constraints and robustness to small fluctuations in drug concentrations. This methodology  
59 is rooted in optimal control theory and incorporates an experimentally derived mathematical model of evo-  
60 lutionary dynamics of cancer growth, mutation and small molecule inhibitor pharmacodynamics to solve  
61 for optimal drug scheduling strategies that address tumor heterogeneity and constrain drug-resistant tumor  
62 evolution. Our key new insights include (1) heterogeneous tumor cell populations are better controlled with  
63 switching strategies; indeed, static two-drug strategies are unable to effectively control all tumor subpop-  
64 ulations in our study; (2) constant combination drug strategies are less robust to perturbations in drug  
65 concentrations for heterogeneous tumor cell populations, and hence more likely to lead to tumor progression;  
66 (3) countering the outgrowth of subclonal tumor populations by switching polytherapies even during a bulk  
67 tumor response can offer better tumor cell population control, offering a non-intuitive clinical strategy that  
68 pro-actively addresses molecular progression before evidence of clinical or radiographic progression appears.

## 69 **3 Results**

### 70 **3.1 The presence and evolution of intratumoral genetic heterogeneity in a pa-** 71 **tient with EGFR-mutant lung adenocarcinoma**

72 To explore the utility of our approach, we focused on EGFR-mutant lung adenocarcinoma. Many mechanisms  
73 of resistance to EGFR-targeted therapies in lung adenocarcinoma are well characterized [19]. Furthermore,  
74 tumor heterogeneity and multiple resistance mechanisms arising in a single patient can occur [2, 19]. Thus,  
75 overcoming polygenic resistance is of paramount importance in this disease and will likely require a non-  
76 standard approach. To illustrate this point, we investigated the molecular basis of targeted therapy resistance  
77 in a 41-year old male never-smoker with advanced EGFR-mutant (L858R) lung adenocarcinoma. This pa-  
78 tient responded to first-line treatment with erlotinib but progressed on this therapy within only four months  
79 after initial treatment, instead of the typical 9-12 month progression free survival observed in EGFR-mutant

lung adenocarcinoma patients. We reasoned that genomic analysis of this patient's outlier clinical phenotype could reveal the molecular pathogenesis of suboptimal erlotinib response. Using a custom-capture assay [20, 21], we deeply sequenced the coding exons and selected introns of 389 cancer-relevant genes in both the pre-treatment and the erlotinib-resistant tumor specimen and matched normal blood to identify somatic alterations that could mediate resistance (Materials and Methods). Exome sequencing of the pre-treatment specimen confirmed the presence of the EGFR<sup>L858R</sup> mutant allele that was identified through prior clinical PCR-based sequencing of this EGFR<sup>L858R</sup> specimen (data not shown), and additionally revealed mutant allele-specific focal amplification of the EGFR coding locus that resulted in a high allelic frequency (95% variant frequency) (Fig. 1B-C). We discovered a rare concurrent subclone in the treatment-naïve tumor with a BRAF<sup>V600E</sup> mutation (6% variant frequency; Fig. 1B). This observation is consistent with a recent report of a BRAF<sup>V600E</sup> mutation in an erlotinib-resistant lung adenocarcinoma specimen [22] and recent data indicating that EGFR-mutant lung adenocarcinoma cells can often develop EGFR TKI resistance through RAF-MEK-ERK pathway activation [23]. The frequency of the subclonal BRAF<sup>V600E</sup> mutation increased approximately 10-fold upon acquired erlotinib resistance, from 6% to 60% in the primary and recurrent tumor, respectively (Figure 1C). This increase in the BRAF<sup>V600E</sup> allelic fraction was likely due to the expansion of the BRAF<sup>V600E</sup> subclone, given that we found no evidence that this increased frequency occurred as a result of focal BRAF amplification in the resistant tumor (Figure 1C). Beyond the outgrowth of mutant BRAF, we identified two additional genetic alterations in the resistant tumor that could contribute to EGFR TKI resistance: focal amplification of 7q31.2 encoding MET in the resistant tumor cells, a low frequency EGFR<sup>T790M</sup> mutation (14% variant frequency) (Fig. 1B-C). All candidate somatic mutations and focal copy number amplifications conferring resistance to erlotinib therapy (in EGFR, BRAF, and MET) were confirmed by independent, validated DNA sequencing and FISH assays (data not shown). Thus, erlotinib therapy acted as a selective pressure for the evolution of multiple concurrent clonal and subclonal genetic alterations that could cooperate to drive rapid drug-resistant disease progression in EGFR-mutant lung adenocarcinoma.

105

## 106 3.2 Analysis of clonal concurrence and resistance

107 While BRAF<sup>V600E</sup>, MET activation, and EGFR<sup>T790M</sup> can individually promote EGFR TKI resistance [22, 24,  
108 25], the therapeutic impact of the concurrence of these alterations we uncovered has not been characterized.  
109 Therefore, we studied the effects of BRAF<sup>V600E</sup>, MET activation, and EGFR<sup>T790M</sup>, alone or in combination,  
110 on growth and therapeutic response in human EGFR-mutant lung adenocarcinoma cellular models. First,  
111 we found that expression of V600E but not wild-type (WT) BRAF promoted resistance to erlotinib in 11-18  
112 cells that endogenously express EGFR<sup>L858R</sup> (Fig. S1). This erlotinib resistance in BRAF<sup>V600E</sup>-expressing  
113 EGFR-mutant 11-18 cells was overcome by concurrent treatment with erlotinib and selective inhibitors of  
114 either BRAF or MEK (vemurafenib [26] and trametinib [27] respectively (Fig. S2, S3). We next used the  
115 11-18 system to test the effects of MET activation by hepatocyte growth factor (HGF), which phenocopies  
116 the effects of MET amplification in EGFR TKI resistance[25, 28] on therapeutic sensitivity. We found that  
117 MET activation not only promoted erlotinib resistance in parental 11-18 cells but also enhanced the effects  
118 of BRAF<sup>V600E</sup> expression on erlotinib resistance in these cells (Fig. S1). This resistance induced by MET  
119 activation in 11-18 parental and BRAF<sup>V600E</sup>-expressing cells was accompanied by increased phosphorylation  
120 of MEK, ERK, and AKT (Fig. S3). Treatment with the MEK inhibitor trametinib, but not the BRAF  
121 inhibitor vemurafenib or the MET inhibitor crizotinib, overcame erlotinib resistance and inhibited phospho-  
122 ERK in MET-activated BRAF<sup>V600E</sup>-expressing 11-18 cells (Fig. S3), providing a rationale for polytherapy  
123 against EGFR and MEK in EGFR-mutant tumors with activating co-alterations in MET and BRAF.

124 Given that we found a rare EGFR<sup>T790M</sup> subclone in the polyclonal resistant tumor, we next explored  
125 whether BRAF<sup>V600E</sup> expression could promote resistance to EGFR TKI treatment in H1975 human lung  
126 adenocarcinoma cells that endogenously express EGFR<sup>T790M</sup> and EGFR<sup>L858R</sup>. We observed that BRAF<sup>V600E</sup>  
127 modestly decreased sensitivity to afatinib, an approved irreversible EGFR kinase inhibitor effective against  
128 EGFR<sup>T790M</sup> [29], and that this effect of BRAF<sup>V600E</sup> on afatinib sensitivity was blunted by vemurafenib (Fig.  
129 S4). Together, our data indicate that erlotinib therapy induced the evolution of multiple concurrent events  
130 that re-shaped the polyclonal tumor genetic landscape during the onset of resistance; resistance could be  
131 overcome by polytherapy against both EGFR and MAPK signaling in preclinical models.

### 132 **3.3 Polytherapy Provides Temporary Response in Heterogeneous or MET Ac-** 133 **tivated Tumors**

134 While we conducted a finite set of experiments to test various rational drug combinations that could address  
135 the heterogeneous basis of resistance in this patient's disease, this approach is not easily scaled; further, it  
136 is not readily feasible to explore all possible drug combinations and drug doses over a continuous range or  
137 anticipate the effects of the myriad of possible tumor subcompositions on tumor control under treatment  
138 using cell-based assays alone. Therefore, we sought to provide a more general and scalable framework for  
139 understanding the impact of each genetically-informed targeted therapy strategy on the temporal evolution  
140 of the multiple concurrent EGFR-mutant tumor cell subclones present in this patient, as a potentially more  
141 generalizable platform. We developed an ordinary differential equation (ODE) model of tumor growth,  
142 mutation and selection by small molecule inhibitors with parameters identified from experimental data (Fig.  
143 2A-B and Equation S1) and interrogated it to uncover the limitations of the targeted treatments in the context  
144 of tumor heterogeneity and evolution. We first confirmed that our model was able to capture the essential  
145 tumor population dynamics by showing a qualitative equivalence between the patient's clinical course and  
146 our model simulation of similar tumor subpopulations consisting of 94 % EGFR<sup>L858R</sup>, 6% BRAF<sup>V600E</sup> and  
147 assuming the existence of a very low initial frequency of 0.01% MET amplification of EGFR<sup>L858R</sup>, BRAF<sup>V600E</sup>  
148 and EGFR<sup>T790M</sup> in the presence of 1  $\mu$ M erlotinib (Fig. 3A-B).

149 To systematically explore the utility of many different drug combination regimens to overcome polygenic  
150 resistance, we used our computational model to calculate the efficacy of clinically relevant doses of erlotinib  
151 and afatinib in combination with either crizotinib, trametinib or vemurafenib on the growth of parental  
152 11-18 and H1975 cells EGFR mutant cell lines. We found that most polytherapies could address only certain  
153 subpopulations (Fig. 4A). For example, the afatinib/trametinib combination elicited a complete response for  
154 a representative heterogeneous MET- tumor cell population comprised of (89% EGFR<sup>L858R</sup>, 10% EGFR<sup>L858R</sup>  
155 BRAF<sup>V600E</sup>, 1% EGFR<sup>L858R</sup>, T790M) compared to rapid progression for its MET activated analog (Fig. 4C).  
156 Moreover, we computed the concentrations of erlotinib or afatinib in combination that could guarantee a  
157 progression-free response for both MET activated or MET neutral tumor cell populations (SI, Mathematical  
158 Methods) and found that in many cases, the concentrations were considerably higher than clinically feasible

159 (due to either known pharmacokinetic limitations or dose limiting toxicities) (Fig. 4B).

160 To better understand the efficacy of the combination therapy over time, we sought to classify which  
161 initial tumor cell subpopulations could eventually lead to therapeutic failure when treated with different  
162 concentrations of EGFR TKIs in combination with crizotinib, trametinib or vemurafenib. We defined the  
163 evolutionary stability of a subpopulation as the worst-case evolutionary outcome, in each case where the  
164 particular subpopulation is present upon treatment initiation. More precisely, the evolutionary stability is  
165 the maximum eigenvalue of each evolutionary branch downstream of the subclone (SI, Section 3.2). This  
166 approach provides an assessment of which subclones present in the initial tumor cell population are likely  
167 to lead to overall progression (a positive evolutionary stability) versus those that lead to response (a neg-  
168 ative evolutionary stability) when treated with a particular combination therapy. Our analysis confirms  
169 that progression-free response on combination therapies is sensitive to both EGFR TKI concentration and  
170 dependent on whether pre-existent subpopulations are effectively targeted at these concentrations (Fig. 4D  
171 and Fig. S5-S7). Overall, this analysis revealed that combinations of two signal transduction inhibitors had  
172 limited effectiveness in durably controlling resistance over a longer time horizon.

### 173 **3.4 Engineering Drug Scheduling to Control Tumor Evolution**

174 We next explored how the rational design of combination drug scheduling strategies could address this issue.  
175 Experimental studies have recently proposed drug pulsing [30] or drug switching [10] as a strategy to delay  
176 the growth of certain cancers. To this end, we proposed a novel methodology rooted in engineering principles  
177 to design drug scheduling strategies that best control the growth and evolution of tumor cell populations.  
178 In particular, we apply concepts from optimal and receding horizon control theory to our experimentally  
179 integrated model of lung adenocarcinoma evolution to compute treatment strategies that minimize tumor  
180 cell populations over time. Our algorithm allows for the specification of treatment design constraints such as  
181 maximum dose, the time horizon over which the treatment strategy is applied and the switching horizon, that  
182 is the minimum time over which one particular treatment can be applied. This algorithm can be extended  
183 to include other drug related characteristics and treatment design constraints. In addition, the framework  
184 allows for the analysis of tradeoffs between these aspects of the design space as well as others, such as how  
185 robust the predicted treatment strategies are with respect to uncertainties in the model or perturbations in



186 drug dosages.

187 For a predetermined time and minimum switching horizon, we define an optimal control problem (SI,  
188 Algorithm 1) and solve for the drug combination that best minimizes the existing tumor cell subpopulations  
189 for every receding switching horizon. Given that any one polytherapy is unlikely to be simultaneously effective  
190 against all subpopulations, the resulting optimal strategy, which maximizes the response of the tumor cells  
191 present at every time horizon (SI, Mathematical Methods), is potentially one that switches between drug  
192 combinations, at defined time points during the treatment course.

193 As proof-of-principle, we determined which drug scheduling regimens could maximally reduce different  
194 initial tumor cell populations by solving our control problem for different allowable switching horizons over a  
195 thirty day period (Fig. 5). The afatinib/trametinib combination was the optimal constant strategy for tumor  
196 cell populations harboring the EGFR<sup>L858R,T790M</sup> mutation, and although this strategy invoked progression  
197 free response in HGF- tumor cell populations, most L858R HGF+ tumor cell populations progressed on  
198 the therapy over thirty days (Fig. 5A vs 5C and Fig. S6AB). For the HGF- tumor population comprised  
199 of 89% EGFR<sup>L858R</sup>, 10% EGFR<sup>L858R</sup>BRAF<sup>V600E</sup> and 1% EGFR<sup>L858R,T790M</sup>, the optimal constant strategy  
200 provided overall response leaving a dominant EGFR<sup>L858R</sup>BRAF<sup>V600E</sup> tumor subpopulation present whereas  
201 the optimal ten day switching strategy provided an enhanced response over the constant strategy by alter-  
202 nately targeting EGFR<sup>L858R</sup> and EGFR<sup>L858R, T790M</sup> tumor cell subpopulations (Fig. 5B). In the case of the  
203 HGF treated tumor cell distribution consisting of 90% EGFR<sup>L858R</sup> and 10% EGFR<sup>L858R,T790M</sup>, a constant  
204 combination of afatinib/trametinib was effective against the EGFR<sup>L858R,T790M</sup>, HGF+ subpopulation de-  
205 spite overall progression due to the outgrowth of the EGFR<sup>L858R</sup>, HGF+ tumor cell population, whereas  
206 a five day switching regimen between afatinib/trametinib and erlotinib/crizotinib combinations alternately  
207 targeted the HGF+ EGFR<sup>L858R,T790M</sup> and the EGFR<sup>L858R</sup> subpopulations (Fig. 5B and Fig. 3A) leading  
208 to overall response.

209 More generally, the optimal constant strategies determined by our algorithm are combinations that best  
210 minimize existing tumor cell subpopulations at every switching horizon. In particular, a greater reduction in  
211 tumor cells can be achieved by switching between therapies that alternately target different subpopulations,  
212 even while there is overall response in the tumor (Fig. 5A). This finding suggests a non-intuitive approach to

213 the clinical management of solid tumors that would represent a departure from the current standard clinical  
214 practice. Our model suggests an advantage to switching treatments pro-actively even during a bulk tumor  
215 response, while the current paradigm in the field is to switch from the initial treatment to a new drug(s)  
216 only after there is clear evidence of radiographic or clinical progression on the initial treatment.

217 To understand the potential benefits of switching strategies in tumors with different initial genetic hetero-  
218 geneity, we computed the optimal switching strategies for a subset of tumor cell distributions and compared  
219 them to their corresponding computed optimal constant strategies. We found that the larger the number  
220 of subclones present in the initial tumor, the more beneficial even a small number of switches could be  
221 for overall tumor cell population control (Fig. 6A and Fig. S8A). For a highly heterogeneous tumor cell  
222 population comprised of HGF treated 89% EGFR<sup>L858R</sup>, 10% EGFR<sup>L858R</sup>BRAF<sup>V600E</sup>, 1% EGFR<sup>L858R,T790M</sup>  
223 mutations, the predicted fifteen day switching therapy (afatinib/trametinib followed by erlotinib/crizotinib)  
224 provides an immediate benefit versus the predicted constant treatment strategy (afatinib/trametinib), yield-  
225 ing a 10-fold decrease in final tumor population. By contrast, for a more homogeneous tumor consisting  
226 of 90% EGFR<sup>L858R</sup>, 10% EGFR<sup>L858R,T790M</sup>, the optimal predicted 30, 15 and 10 day switching strategies  
227 are indistinguishable from the constant therapy strategy for population control. Our predictions indicate  
228 that a similar 10-fold reduction in final population (similar to that achieved in the heterogeneous tumor  
229 instance analyzed above) is achieved only with a more rapid, five day switching strategy for this more ho-  
230 mogeneous tumor population (afatinib/trametinib, then alternating between erlotinib/trametinib and afa-  
231 tinib/vemurafenib). These findings emphasize our results that while polytherapy may provide a response  
232 in some subsets of tumor cell populations, it provides only a temporary or no response in heterogeneous or  
233 MET activated tumors; in these cases, even minimal therapy switching can provide an immediate and more  
234 substantial benefit for overall tumor population control.

### 235 3.5 Robustness Analysis of Switching Strategies

236 Motivated by studies indicating that tissue to plasma ratios for certain drugs such as erlotinib can be low [31],  
237 we sought to computationally explore how dose reductions of TKI combinations could affect the evolution of  
238 tumor cell populations. This is a particularly relevant clinical issue, as many drugs when used in combination  
239 often require a reduction in the recommended monotherapy dose due to toxicity of the dual drug therapy

240 in patients. To examine this question, we simulated the optimal switching strategies corresponding to 30,  
241 15, 10, 5 and 1 day switching horizons subject to EGFR TKI dose reductions for a set of initial tumor  
242 cell populations and studied the effects on the final and average tumor populations over the course of the  
243 treatment (SI, Mathematical Methods).

244 For a tumor with a smaller number of initial subclones, such as one comprised of 90% EGFR<sup>L858R</sup>  
245 and 10% EGFR<sup>L858R,T790M</sup>, all switching strategies induced a response for EGFR TKI dose reductions of  
246 up to 50% (Fig. 6A). In contrast, with the more complex HGF treated tumor cell population comprised  
247 of 89% EGFR<sup>L858R</sup>, 10% EGFR<sup>L858R</sup>BRAF<sup>V600E</sup>, 1% EGFR<sup>L858R,T790M</sup>, only combination strategies with  
248 switching horizons of 10 day or shorter induced a response (Fig. 6B). Notably, we observed that the shorter  
249 the switching horizon, the higher dose reduction that could be supported while still maintaining a progression  
250 free response (Fig. 6B and Fig. S8B). We observed this phenomenon more generally when we simulated  
251 different tumor cell initial distributions (Fig. 6C). Thus, we find that the greater number of subclones  
252 present in the initial tumor, the greater the benefit there is in increasing switching frequency in terms of the  
253 achieving robustness to perturbations in EGFR TKI drug concentration.

### 254 3.6 Switching Strategies Control or Delay Progression in Vitro

255 Motivated by the results of our treatment strategy algorithm, we tested drug scheduling strategies on select  
256 tumor subpopulations in an *in vitro* model of EGFR mutant lung adenocarcinoma. Specifically, we syn-  
257 thesized the optimal treatment strategy for a heterogeneous HGF treated tumor cell population consisting  
258 of 89% EGFR<sup>L858R</sup>, 10% EGFR<sup>L858R</sup>BRAF<sup>V600E</sup>, 1% EGFR<sup>L858R,T790M</sup>, and imposed a constraint that at  
259 most one switch could occur, as a starting point to simulate what might be most clinically feasible. The  
260 resulting optimal treatment strategy predicted by our modeling, consisting of the erlotinib/crizotinib (days  
261 0-5) followed by the afatinib/trametinib (days 5-30) combination, was shown to elicit the best response *in*  
262 *vitro*, validating our predictive model (Fig. 7B).

263 To show how a delay in the switching time might affect response to therapy, we tested equivalent initial  
264 tumor cell populations but changed the treatment strategy to start the afatinib/trametinib combination at  
265 day 10 instead of at day 5. This resulted in worse overall response than the 5 day switching regimen (Fig.  
266 7B). The corresponding model simulation highlights that although the erlotinib/crizotinib combination effec-

267 tively targeted the HGF treated EGFR<sup>L858R</sup> mutation during the first 10 days, it allowed the HGF treated  
268 EGFR<sup>L858R, T790M</sup> subclone to dominate for a longer period of time, thereby impeding overall response.

## 269 4 Discussion

270 One of the fundamental challenges in the principled design of combination therapies is the pre-existence  
271 and temporal expansion of intratumor genetic heterogeneity that can often lead to rapid resistance with  
272 first-line targeted therapies. To address this problem, we sought to develop a new modeling framework to  
273 systematically design principled tumor monitoring and therapeutic strategies. We applied a receding horizon  
274 optimal control approach to an evolutionary dynamics and drug response model of lung adenocarcinoma  
275 that was identified from experimental and clinical data. Based on the clinical and experimental data, our  
276 computational method generated optimal drug scheduling strategies for a comprehensive set of initial tumor  
277 cell subpopulation distributions.

278 Our initial insight was that constant drug combination strategies that guarantee progression free response  
279 for tumor cell populations with considerable heterogeneity and/or MET activation, required EGFR TKI  
280 concentrations that were considerably higher than are typically clinically feasible. At clinically relevant doses,  
281 these constant combination strategies were not effective against all tumor cell subpopulations and inevitably,  
282 those subpopulations with even slight evolutionary advantages could undergo clonal expansion and cause  
283 resistance. To overcome this issue, we used our algorithm to generate optimal drug scheduling strategies that  
284 could preempt the outgrowth of these subpopulations over fixed switching periods, and showed that these  
285 strategies outperformed constant combination strategies for most tumor cell subpopulation distributions.  
286 Notably, our computational analysis showed there was more benefit in applying switching strategies in  
287 the context of increasing pre-existing genetic heterogeneity and these switching strategies provided more  
288 robustness guarantees in the presence of perturbations in drug concentrations that can occur in patients. We  
289 demonstrated successful *in vitro* validation of our optimal control approach for selected tumor subpopulation  
290 distributions. In particular, for an *in vitro* analog of our clinical case, a non-intuitive combination therapy  
291 switching strategy offered better tumor control than constant treatment strategies.

292 We found that the most effective drug scheduling strategies were ones that addressed existing subpopu-

293 lations as they emerged during the course of the treatment, even during a bulk tumor response. In contrast,  
294 current standard of care clinical practice is generally to delay switching to second-line therapy until after  
295 there is clear evidence of radiographic or clinical progression. Our approach suggests a paradigm shift that  
296 would require regular monitoring of an individual patient’s tumor mutational status, for instance by muta-  
297 tional analysis of plasma cell-free circulating tumor DNA, so-called “liquid biopsies” [32, 33, 34, 35, 36]. Our  
298 modeling strategy could potentially synthesize this genetic information to yield both the design and priori-  
299 tization of specific drug regimens and the optimal time for clinical deployment, informed by the molecular  
300 findings in a particular patient. Such treatments may need to be applied (non-intuitively) during the initial  
301 tumor response, instead of later during therapy or after drug resistance is readily apparent by standard clini-  
302 cal measures in some cases. We envision that our approach could help contribute to the shift from a reactive  
303 to pro-active, dynamic management paradigm in solid tumor patients in the molecular era. Drug scheduling  
304 strategies synthesized by the algorithm for the initial tumor cell population could be adapted to account for  
305 genetic alterations that are detected by the analysis of serial liquid (or tumor) biopsies, leading to a dynamic  
306 learning model through iterative refinements; as such, the model could suggest more effective strategies with  
307 time. Additional considerations such as pharmacokinetics, the tumor microenvironment and metastatic pro-  
308 cesses [37, 38] could extend this model to add more clinical relevance. Finally, our approach could guide the  
309 optimal timing of serial clinical specimen sampling (plasma, tumor) and radiographic analysis to streamline  
310 clinical management. Overall, the combination of techniques stemming from mathematical optimization and  
311 control theory combined with more clinically applicable tumor dynamics models is a promising approach  
312 to aid the rational design, clinical testing, and clinical adoption of dynamic molecular monitoring and drug  
313 scheduling strategies to better control complex solid cancers such as lung cancer in real-time and improve  
314 clinical outcomes.

## 315 **4.1 Materials and Methods**

### 316 **4.1.1 Computational Methods**

317 The details of mathematical models and experimental methods may be found in *SI Mathematical Meth-*  
318 *ods*. The mathematical model of lung adenocarcinoma growth mutation and selection by small molecule  
319 inhibitors was formulated as system of ordinary differential equations (ODEs). The treatment strategy algo-

320 rithm was formulated as a receding horizon optimal control problem with the objective of minimizing lung  
321 adenocarcinoma populations at every horizon and implemented using python version 3.4.3, scipy version  
322 1.11.0.

#### 323 **4.1.2 Experimental Methods**

324 **Patient sample preparation and sequence capture.** Formalin fixed paraffin embedded (FFPE) NSCLC  
325 fine needle aspirate biopsy specimens and a normal blood sample were obtained from the patient under in-  
326 stitutional informed consent both prior to erlotinib treatment and upon erlotinib resistance. Lung tumor  
327 biopsy specimens contained  $> 75\%$  tumor cells upon histopathological analysis by a board-certified pathol-  
328 ogist. Barcoded sequence libraries were generated using genomic DNA from FFPE tumor material and  
329 matched normal blood using the NuGEN Ovation ultralow library systems and according to manufacturer's  
330 instructions (NuGEN, San Carlos, CA). These libraries were among an equimolar pool of 16 barcoded li-  
331 braries generated and subjected to solution-phase hybrid capture with biotinylated oligonucleotides targeting  
332 the coding exons of 389 cancer-associated genes using Nimblegen SeqV.D.J.Cap EZ (Roche NimbleGen, Inc  
333 , Madison, WI). Each hybrid capture pool was sequenced in a single lane of Illumina HiSeq2000 instrumen-  
334 tation producing 100bp paired-end reads (UCSF Next Generation Sequencing Service). Sequencing data was  
335 demultiplexed to match all high-quality barcoded reads with the corresponding samples.

336

337 **Sequencing Analysis.** Paired-end sequence reads from normal blood, pre-treatment tumor, and erlotinib-  
338 resistant tumor samples were aligned against build hg19 of the reference genome with BWA [39]. Duplicate  
339 reads were marked, alignment and hybridization metrics calculated, multiple sequence realignment around  
340 candidate indels performed, and base quality scores recalibrated across all samples with the Picard suite  
341 (<http://picard.sourceforge.net/>) and the Genome Analysis Toolkit (GATK) [40]. Somatic point mutations  
342 were detected in the treatment-naïve and resistant tumors using MuTect [41], while small insertions and  
343 deletions (indels) were identified with GATK. Given the depth of sequencing achieved and the presence of  
344 low-frequency oncogenic mutations in the normal sample likely due to circulating tumor DNA, mutations  
345 were excluded as germline if they exceeded a frequency of 10% in the normal sample. Non-synonymous muta-  
346 tions were annotated for their sequence context, effect, and frequency in lung adenocarcinoma and squamous

347 cell tumors from The Cancer Genome Atlas (TCGA) project and Imielinski et al. [42]. All previously  
348 characterized oncogenic alleles in NSCLC or mutations previously linked to erlotinib resistance were also  
349 manually inspected in both treatment-naïve and resistant tumors. This analysis revealed a single sequencing  
350 read bearing the T790M mutation in the primary tumor (total coverage at this locus: 1300x). This was in-  
351 sufficient evidence from sequencing data to formally call the mutation, but we cannot exclude the possibility  
352 that EGFR<sup>T790M</sup> exists pre-treatment in a very rare clone (<0.08%) for which our target depth of coverage  
353 limited our sensitivity. DNA copy number alterations were inferred from the mean sequence coverage for  
354 each target region in each sample corrected for overall library size. Amplifications and deletions were deter-  
355 mined from ratios of coverage levels between the pre- and post-treatment tumors and the matched normal  
356 blood sample. Due to the elevated signal to noise from targeted capture and sequencing of FFPE material  
357 from lower input amounts, overt genomic amplifications and deletions were required to affect multiple target  
358 regions (exons) of a given gene before being called as detected. The EGFR<sup>T790M</sup> and BRAF<sup>V600E</sup> variants  
359 were confirmed by a standard Clinical Laboratory Improvement Amendments (CLIA)-approved PCR-based  
360 shifted termination assay (data not shown). The changes in EGFR and MET copy number were validated  
361 using established fluorescence in situ hybridization clinical assays.

362

363 **Cell Lines and Reagents.** Human lung cancer cell lines were acquired as previously described [43, 44].  
364 Cells were grown in RPMI 1640 supplemented with 10% (high serum) or 0.5% (low serum) fetal bovine  
365 serum (FBS), penicillin G (100U/ml) and streptomycin SO4 (100U/ml). Erlotinib, afatinib, vemurafenib,  
366 crizotinib, and trametinib were purchased from Selleck Chemicals (Houston, TX). Drugs were resuspended  
367 in DMSO at a concentration of 10mM and stored at -20 °C. Erlotinib and afatinib were used at working  
368 concentrations ranging from 0.010-1.5 μM. Vemurafenib was used at a working concentration of 5.0 μM, and  
369 trametinib and crizotinib were used at a 0.5 μM. HGF was purchased from Peprotech (Rocky Hill, NJ) and  
370 resuspended at 50 g/ml in sterile PBS + 0.1% BSA. Cells were treated with HGF at 50 ng/ml.

371

372 **Generation of stable cell lines.** 293-GPG viral packaging cells were transfected with pBABE (empty  
373 vector), pBABE-mCherry-BRAF-WT and pBABE-mCherry-BRAFV600E constructs (kindly provided by

374 Dr. Eric Collision, UCSF, San Francisco, CA) using Lipofectamine-2000 (Life Technologies, Pleasanton,  
375 CA) per manufacturer's instructions. Virus containing media was harvested three days post transfection  
376 and used to infect 11-18 and H1975 lung cancer cell lines. Cells were incubated with virus containing media  
377 supplemented with 6  $\mu\text{g}/\text{ml}$  of polybrene for 24 hours. Media was changed to standard cell growth media  
378 (RPMI-1640 + 10% fetal bovine serum and 100 U/ml penicillin G and 100 U/ml streptomycin SO<sub>4</sub>) and  
379 cells were expanded for 48 hours, at which point puromycin (2  $\mu\text{g}/\text{ml}$ ) was added to the media and cells  
380 were allowed to grow for an additional 4 days. Cells that survived puromycin selection (stable cell lines)  
381 were used in all subsequent experiments.

382

383 **Cell Viability and Growth Assays.** Assays were performed as previously described [43, 44]. Briefly, cells  
384 were seeded overnight at a density of 5,000 cells per well in 96-well plates in RPMI containing 10% FBS and  
385 treated with indicated reagents for 72 hours. Viable cell numbers were determined using the CellTiterGLO  
386 assay according to manufacturer's instructions (Promega). Each assay consisted of six replicate wells and  
387 was repeated at least twice in independent experiments. Cell viability is presented as the mean ( $\pm$  s.e.m.)  
388 erlotinib or afatinib inhibitory concentration 50 (IC<sub>50</sub>). Statistical significance between treatment groups  
389 was determined by the Bonferroni's multiple comparisons ANOVA statistical test.

390

391 **Immunoblot analysis.** Cells were harvested 24h after initiation of treatment with reagents. Cells were  
392 scraped and lysed in lysis buffer (50 mM Tris-HCl pH 8.0, 150 mM sodium chloride, 0.1% SDS, 0.5% sodium  
393 deoxycholate, 1% Triton X 100, 5 mM EDTA containing protease and phosphatase inhibitors (Roche Di-  
394 agnostics, Indianapolis, IN). After quantitation by Pierce BCA assays (Thermo Scientific, Rockford, IL),  
395 25  $\mu\text{g}$  of each sample was separated by gel electrophoresis on 4-15% Criterion TGX precast gels (BioRad,  
396 Hercules, CA) and transferred to nitrocellulose membrane. For immunoblots, the following antibodies were  
397 used: anti-total EGFR (1:1000 dilution, Bethyl Laboratories, Inc., Montgomery TX), anti-pEGFR, anti-total  
398 Met, anti-pMet, anti-total Mek, anti-pMek, anti-total Akt, anti-pAkt, anti-total Erk, anti-pErk (1:1000, Cell  
399 Signaling Technology Inc., Danvers, MA), BRAF<sup>V600E</sup> Monoclonal Antibody (Clone VE1, 1:1000, Spring Bio-  
400 science, Pleasanton, CA), BRAF WT (1:1000, Santa Cruz Biotech, Santa Cruz, CA) and anti-actin (1:5000



401 dilution, Sigma-Aldrich, Saint Louis, MO), HRP-conjugated anti-rabbit Ig (used at a 1:3000 dilution, Cell  
402 Signaling), and HRP-conjugated anti-mouse IgG (used at a 1:3000 dilution, Cell Signaling). Specific proteins  
403 were detected by using either ECL Prime (Amersham Biosciences, Sunnyvale, CA) or the Odyssey Li-Cor  
404 (Lincoln, NE) with the infrared dye (IR Dye 800, IR Dye 680)-conjugated secondary antibodies (1:20,000,  
405 Li-Cor).

406

## 407 References

- 408 [1] Swanton C, Govindan R (2016) Clinical implications of genomic discoveries in lung cancer. *New England*  
409 *Journal of Medicine* 374(19):1864–1873.
- 410 [2] Bivona TG, Doebele RC (2016) A framework for understanding and targeting residual disease in  
411 oncogene-driven solid cancers. *Nature medicine* 22(5):472–478.
- 412 [3] Sawyers CL (2012) The 2011 Gordon Wilson Lecture: overcoming resistance to targeted cancer drugs.  
413 *Transactions of the American Clinical and Climatological Association* 123:114.
- 414 [4] Venkatesan S, Swanton C (2015) *Tumor Evolutionary Principles: How Intratumor Heterogeneity Influ-*  
415 *ences Cancer Treatment and Outcome*. Vol. 35, pp. e141–9.
- 416 [5] de Bruin EC et al. (2014) Spatial and temporal diversity in genomic instability processes defines lung  
417 cancer evolution. *Science* 346(6206):251–256.
- 418 [6] Zhang J et al. (2014) Intratumor heterogeneity in localized lung adenocarcinomas delineated by multi-  
419 region sequencing. *Science* 346(6206):256–259.
- 420 [7] Alizadeh AA et al. (2015) Toward understanding and exploiting tumor heterogeneity. *Nature medicine*  
421 21(8):846–853.
- 422 [8] Chmielecki J et al. (2011) Optimization of dosing for egfr-mutant non-small cell lung cancer with  
423 evolutionary cancer modeling. *Science translational medicine* 3(90):90ra59–90ra59.

- 424 [9] Bozic I et al. (2013) Evolutionary dynamics of cancer in response to targeted combination therapy. *Elife*  
425 2:e00747.
- 426 [10] Zhao B et al. (2016) Exploiting temporal collateral sensitivity in tumor clonal evolution. *Cell* 165(1):234–  
427 246.
- 428 [11] Gatenby RA, Silva AS, Gillies RJ, Frieden BR (2009) Adaptive therapy. *Cancer research* 69(11):4894–  
429 4903.
- 430 [12] de Pillis LG, Gu W, Radunskaya AE (2006) Mixed immunotherapy and chemotherapy of tumors: mod-  
431 eling, applications and biological interpretations. *Journal of theoretical biology* 238(4):841–862.
- 432 [13] Zhao B, Pritchard JR, Lauffenburger DA, Hemann MT (2014) Addressing genetic tumor heterogeneity  
433 through computationally predictive combination therapy. *Cancer discovery* 4(2):166–174.
- 434 [14] Zhao B, Hemann MT, Lauffenburger DA (2014) Intratumor heterogeneity alters most effective drugs in  
435 designed combinations. *Proceedings of the National Academy of Sciences* 111(29):10773–10778.
- 436 [15] Bahrami K, Kim M (1975) Optimal control of multiplicative control systems arising from cancer therapy.  
437 *Automatic Control, IEEE Transactions on* 20(4):537–542.
- 438 [16] Swan GW, Vincent TL (1977) Optimal control analysis in the chemotherapy of igg multiple myeloma.  
439 *Bulletin of mathematical biology* 39(3):317–337.
- 440 [17] dOnofrio A, Ledzewicz U, Maurer H, Schättler H (2009) On optimal delivery of combination therapy  
441 for tumors. *Mathematical biosciences* 222(1):13–26.
- 442 [18] Chareyron S, Alamir M (2009) Mixed immunotherapy and chemotherapy of tumors: Feedback design  
443 and model updating schemes. *Journal of theoretical biology* 258(3):444–454.
- 444 [19] Helena AY, Riely GJ, Lovly CM (2014) Therapeutic strategies utilized in the setting of acquired resis-  
445 tance to egfr tyrosine kinase inhibitors. *Clinical Cancer Research* 20(23):5898–5907.
- 446 [20] Gao SP et al. (2007) Mutations in the EGFR kinase domain mediate STAT3 activation via IL-6 pro-  
447 duction in human lung adenocarcinomas. *The Journal of clinical investigation* 117(12):3846–3856.

- 448 [21] Wagle N et al. (2012) High-throughput detection of actionable genomic alterations in clinical tumor  
449 samples by targeted, massively parallel sequencing. *Cancer discovery* 2(1):82–93.
- 450 [22] Ohashi K et al. (2012) Lung cancers with acquired resistance to EGFR inhibitors occasionally harbor  
451 braf gene mutations but lack mutations in KRAS, NRAS, or MEK1. *Proceedings of the National  
452 Academy of Sciences* 109(31):E2127–E2133.
- 453 [23] Tricker EM et al. (2015) Combined egfr/mek inhibition prevents the emergence of resistance in egfr-  
454 mutant lung cancer. *Cancer discovery* 5(9):960–971.
- 455 [24] Pao W et al. (2005) Acquired resistance of lung adenocarcinomas to gefitinib or erlotinib is associated  
456 with a second mutation in the EGFR kinase domain. *PLoS Med* 2(3):e73.
- 457 [25] Turke AB et al. (2010) Preexistence and clonal selection of MET amplification in EGFR mutant NSCLC.  
458 *Cancer cell* 17(1):77–88.
- 459 [26] Gazdar AF, Minna JD (2008) Deregulated EGFR signaling during lung cancer progression: mutations,  
460 amplicons, and autocrine loops. *Cancer Prevention Research* 1(3):156–160.
- 461 [27] Bonavia R et al. (2010) Tumor heterogeneity is an active process maintained by a mutant EGFR-induced  
462 cytokine circuit in glioblastoma. *Genes and development* 24(16):1731–1745.
- 463 [28] Wilson TR et al. (2012) Widespread potential for growth-factor-driven resistance to anticancer kinase  
464 inhibitors. *Nature* 487(7408):505–509.
- 465 [29] Solca F et al. (2012) Target binding properties and cellular activity of afatinib (BIBW 2992), an irre-  
466 versible ErbB family blocker. *Journal of Pharmacology and Experimental Therapeutics* 343(2):342–350.
- 467 [30] Thakur MD et al. (2013) Modelling vemurafenib resistance in melanoma reveals a strategy to forestall  
468 drug resistance. *Nature* 494(7436):251–255.
- 469 [31] Lankheet NA et al. (2015) Concentrations of erlotinib in tumor tissue and plasma in non-small-cell lung  
470 cancer patients after neoadjuvant therapy. *Clinical lung cancer* 16(4):320–324.

- 471 [32] Newman AM et al. (2014) An ultrasensitive method for quantitating circulating tumor dna with broad  
472 patient coverage. *Nature medicine* 20(5):548.
- 473 [33] Oxnard GR et al. (2016) Association between plasma genotyping and outcomes of treatment with os-  
474 imertinib (azd9291) in advanced non-small-cell lung cancer. *Journal of Clinical Oncology* p. JCO667162.
- 475 [34] Chabon J et al. (2016) Circulating tumour dna profiling reveals heterogeneity of egfr inhibitor resistance  
476 mechanisms in lung cancer patients. *Nature communications* 7:11815.
- 477 [35] Newman AM et al. (2016) Integrated digital error suppression for improved detection of circulating  
478 tumor dna. *Nature biotechnology*.
- 479 [36] Lanman RB et al. (2015) Analytical and clinical validation of a digital sequencing panel for quantitative,  
480 highly accurate evaluation of cell-free circulating tumor dna. *PloS one* 10(10):e0140712.
- 481 [37] Anderson AR, Weaver AM, Cummings PT, Quaranta V (2006) Tumor morphology and phenotypic  
482 evolution driven by selective pressure from the microenvironment. *Cell* 127(5):905–915.
- 483 [38] Scott JG et al. (2013) Mathematical modeling of the metastatic process in *Experimental Metastasis:  
484 Modeling and Analysis*. (Springer), pp. 189–208.
- 485 [39] Li H, Durbin R (2009) Fast and accurate short read alignment with burrows-wheeler transform. *Bioin-  
486 formatics* 25(14):1754–1760.
- 487 [40] McKenna A et al. (2010) The genome analysis toolkit: a mapreduce framework for analyzing next-  
488 generation dna sequencing data. *Genome research* 20(9):1297–1303.
- 489 [41] Cibulskis K et al. (2013) Sensitive detection of somatic point mutations in impure and heterogeneous  
490 cancer samples. *Nature biotechnology* 31(3):213–219.
- 491 [42] Imielinski M et al. (2012) Mapping the hallmarks of lung adenocarcinoma with massively parallel se-  
492 quencing. *Cell* 150(6):1107–1120.
- 493 [43] Bivona TG et al. (2011) Fas and nf- $\kappa$ b signalling modulate dependence of lung cancers on mutant  
494 egfr. *Nature* 471(7339):523–526.

495 [44] Zhang Z et al. (2012) Activation of the axl kinase causes resistance to egfr-targeted therapy in lung  
496 cancer. *Nature genetics* 44(8):852–860.

## 497 **5 Acknowledgements**

498 The authors acknowledge funding support from NIH, the Pew-Stewart Charitable Trust, the Kinship-Searle  
499 Foundation, and the Van Auken Foundation (to TGB). C.M.B was supported by grants from The Lung  
500 Cancer Research Foundation (P0060520) and AACR (14-40-18-BLAK). J.C.D. provided funding for V.D.J.  
501 and N.M..

## 502 **6 Author contributions**

503 T.G.B., V.D.J. and C.M.B. conceived and designed the study. V.D.J. conceived and developed the math  
504 model and algorithm. V.D.J. and N.M. implemented the algorithm. C.M.B and V.D.J., designed experi-  
505 ments, performed experiments and analyzed data. V.O. and L.L. performed experiments. L.L., and B.C.B.  
506 performed sequencing. S.A., B.C.B., and B.S.T. analyzed sequencing data. M.A.G. provided tumors for  
507 analysis. V.D.J., C.M.B. and T.G.B. wrote the manuscript, with input from all authors. We thank Niko-  
508 letta Sidiropoulos for pathology assessment and independent confirmation of the BRAF V600E mutation.  
509 We thank Tyrrell Nelson for assistance in sequencing library preparation.

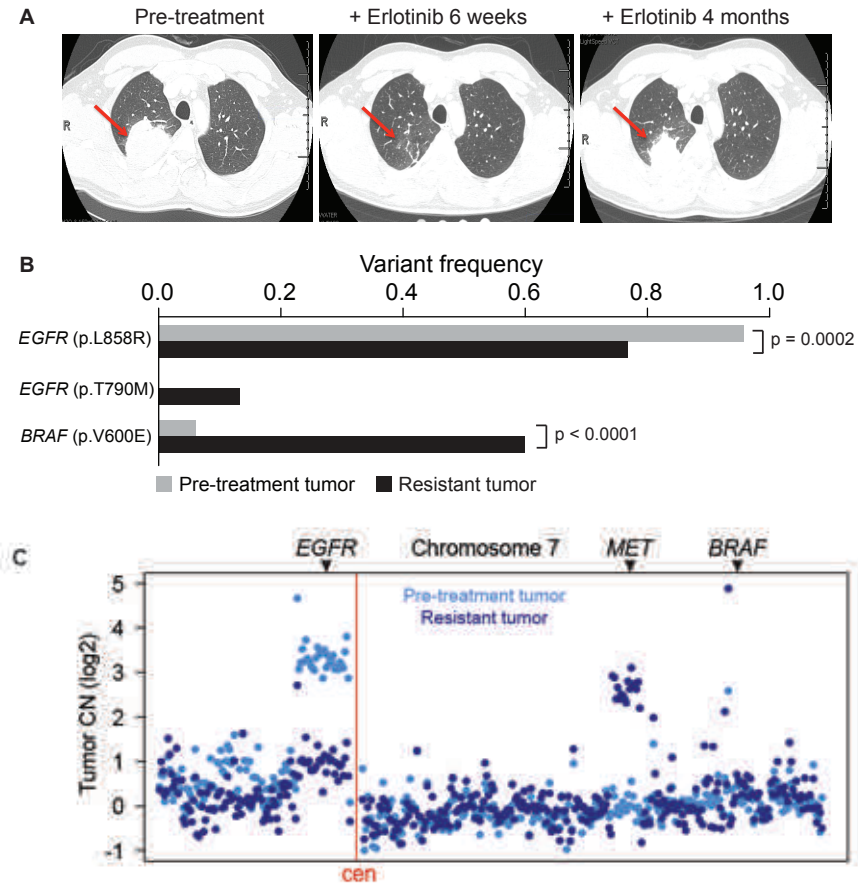

Figure 1: Concurrent genetic alterations drive rapid resistance to EGFR TKI treatment in EGFR-mutant lung adenocarcinoma. (A) Computed tomography indicates the clinical course and timeline of disease in the patient with rapid progression on EGFR TKI therapy and shows the EGFR-mutant lung adenocarcinoma (red arrows) analyzed both prior to erlotinib treatment and upon resistance at 4 months. (B) Key somatic mutations identified by exon-capture and deep sequencing of the pre- and post-treatment tumor in (A) demonstrating concurrent alterations in EGFR and BRAF and the frequency of each mutation in pre- and post- treatment tumor samples. P-values indicated as determined by a two-tailed Fischer's exact test. (C) DNA copy number alterations inferred from exon-capture and sequencing data indicate the focal amplification of the EGFR<sup>L858R</sup>-mutant allele was lost upon acquired resistance while the patient's resistant tumor gained a focal amplification of MET, with no change in BRAF (relative positions indicated, chromosome 7).

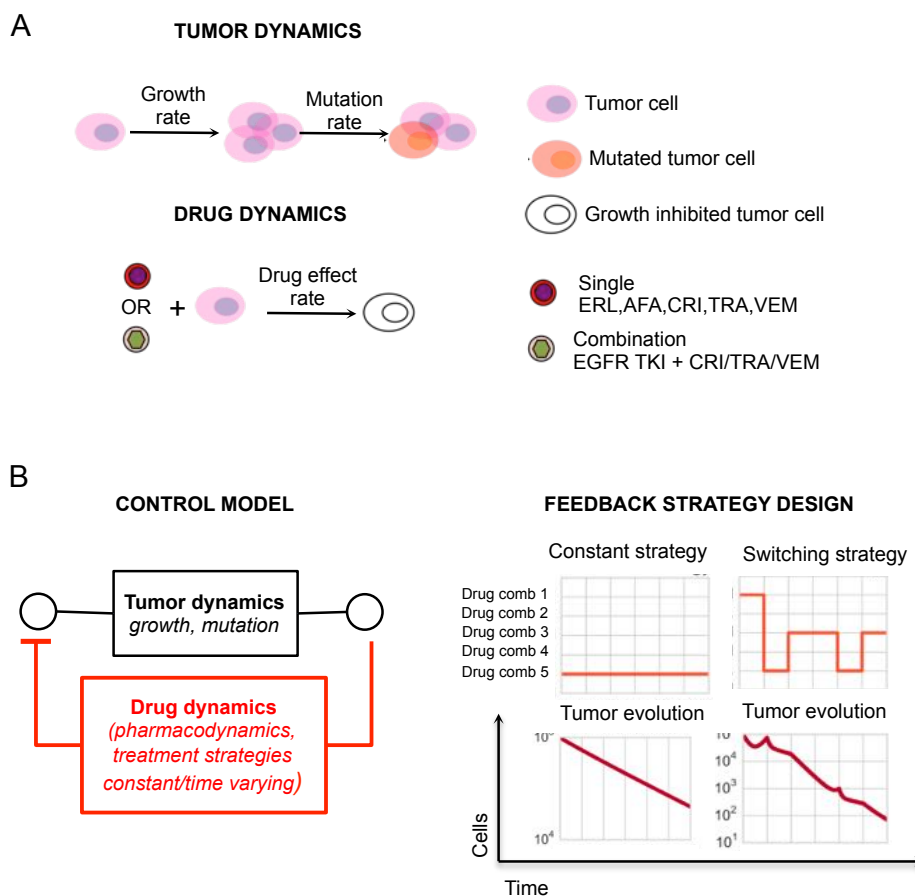

Figure 2: Designing treatment strategies to control tumor cell dynamics. (A) A depiction of the growth, mutation and drug effect model representing the evolutionary dynamics of lung adenocarcinoma in the presence of small molecule inhibitors, erlotinib (ERL), afatinib (AFA), crizotinib (CRI), trametinib (TRA) and vemurafenib (VEM). The corresponding ordinary differential equation model (ODE) is specified in mathematical detail in the Supplementary Information, Equation (S1). Drug effect curves were determined for H1975 and H1183 cell lines specified for both single drugs and combinations of varying concentrations of one EGFR TKI (erlotinib or afatinib), with fixed concentrations of either 5  $\mu\text{M}$  vemurafenib, 0.5  $\mu\text{M}$  trametinib or 0.5  $\mu\text{M}$  crizotinib (SI, Fig. S1-S4). (B) The design of constant or switching feedback strategies to control the dynamics of lung adenocarcinoma is approached as an optimal control problem. The treatment strategy design algorithm (SI, Section 2) solves for feedback strategies that minimize tumor cell growth over the course of the treatment.

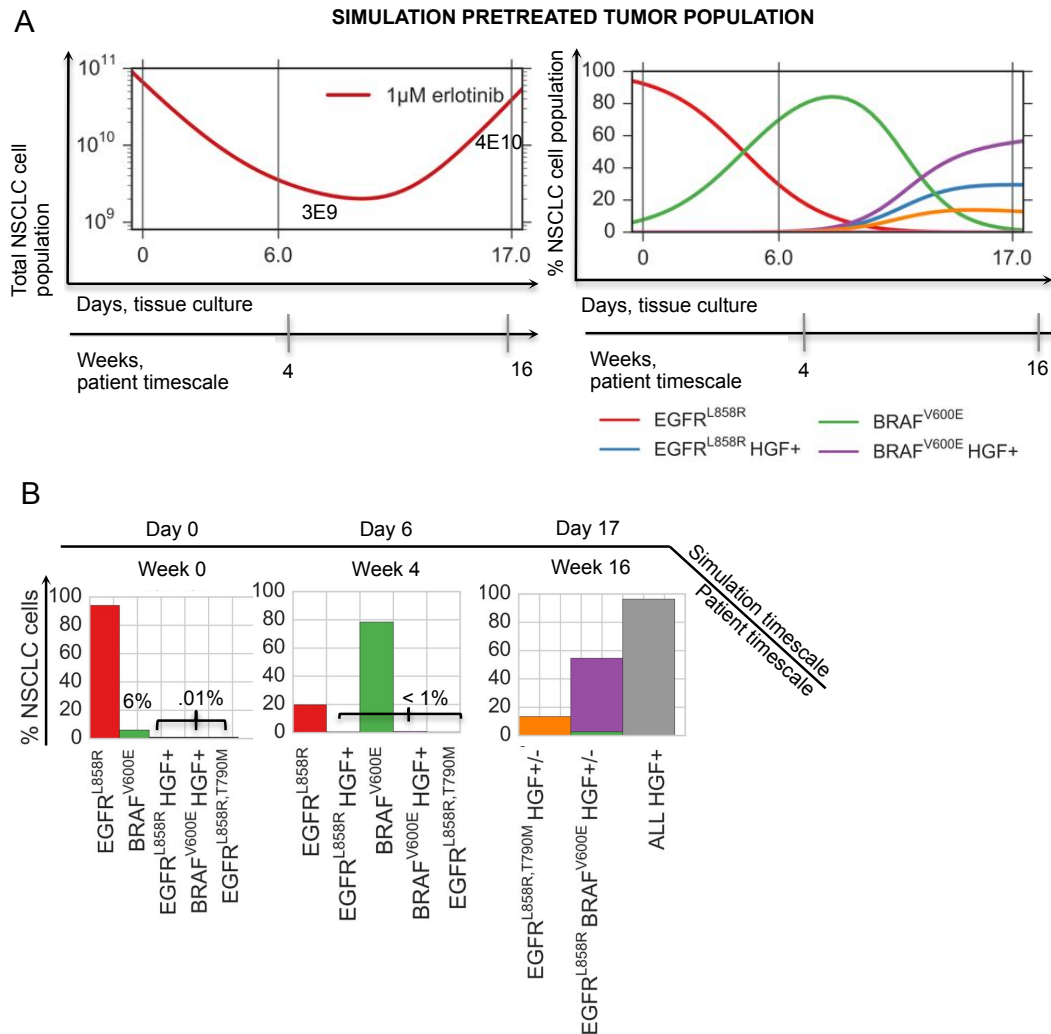

Figure 3: Mathematical simulation qualitatively captures the patient's evolution on erlotinib. (A) A simulation of the mathematical model of lung adenocarcinoma evolution (SI, Equation (S1)) in the presence of  $1 \mu\text{M}$  erlotinib, given the patient-derived pretreatment initial tumor cell subpopulations (94 % EGFR<sup>L858R</sup>, 6% BRAF<sup>V600E</sup>, 0.01% MET amplification of EGFR<sup>L858R</sup>, BRAF<sup>V600E</sup> and EGFR<sup>T790M</sup>). (B) Tumor cell populations present at day 0, 6 and 17 of the simulation in (A), including the total HGF+ cell population at day 17 (gray). The model qualitatively captures a possible evolutionary trajectory and results in a similar final tumor cell composition as that of the patient, (B) day 17 vs. Figure 1, (B) and (C).



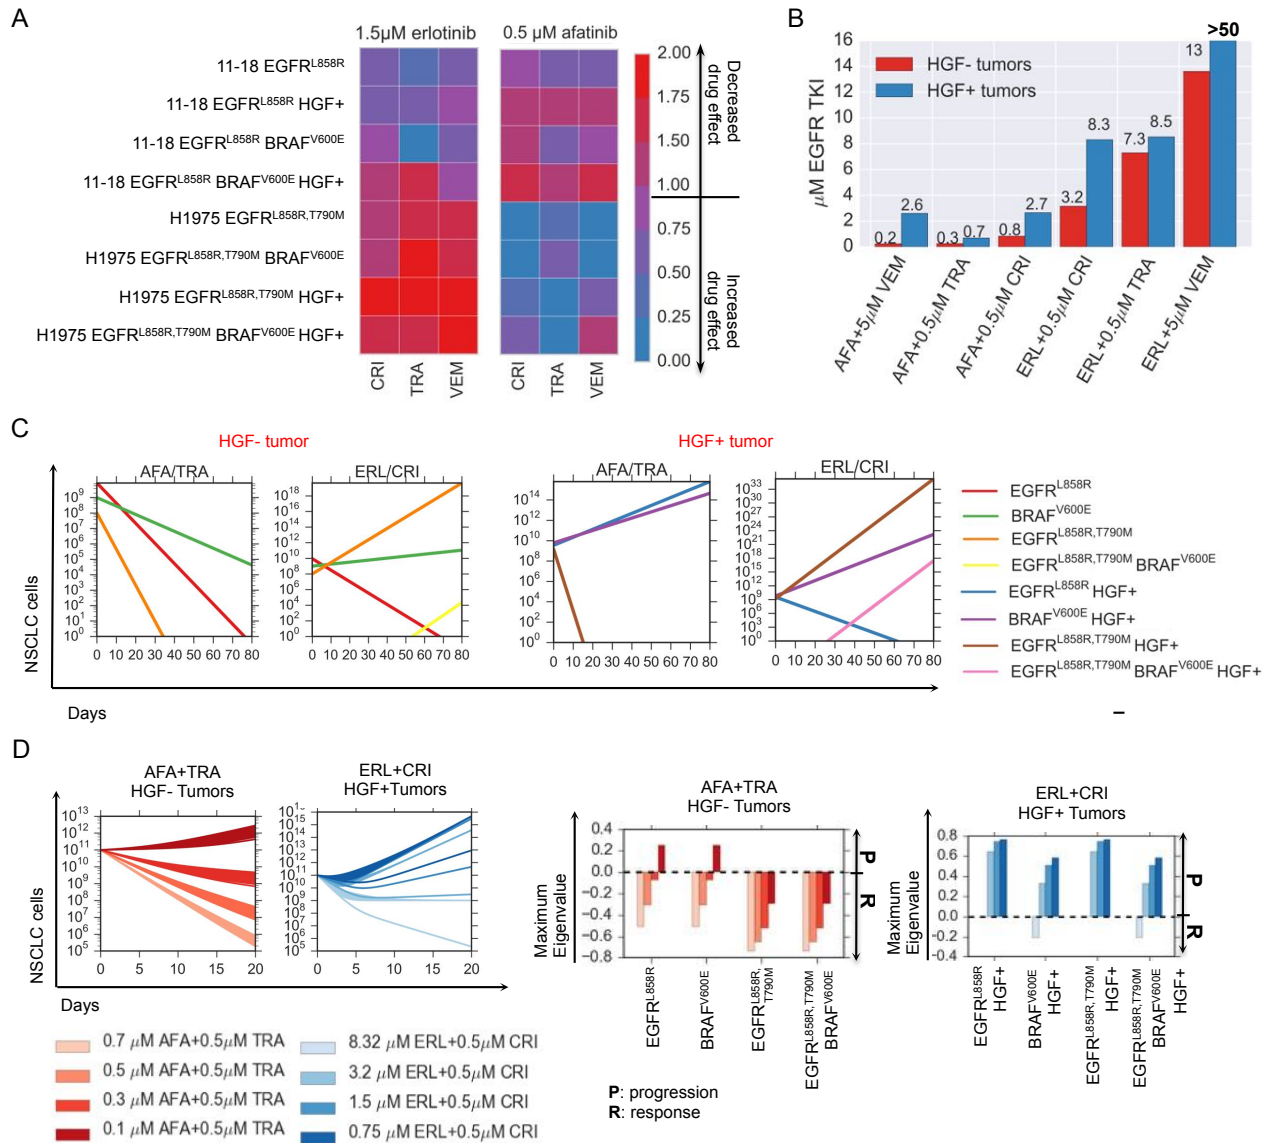

Figure 4: Modeling pharmacodynamic effects of concurrent BRAF<sup>V600E</sup> expression and MET activation in EGFR-mutant lung adenocarcinoma cells and their implication on progression. (A) Drug efficacy as measured by the effect of 1.5  $\mu\text{M}$  erlotinib or 0.5  $\mu\text{M}$  afatinib in combination with either 0.5  $\mu\text{M}$  MET inhibitor crizotinib, 0.5  $\mu\text{M}$  MEK inhibitor trametinib or 5  $\mu\text{M}$  BRAF inhibitor vemurafenib on cell growth (SI, Equation S1) of parental 11-18 EGFR<sup>L858R</sup>-positive lung adenocarcinoma cells or those cells engineered to express mutations listed above and treated with 0 or 50 ng/ml HGF. (B) Concentrations of EGFR TKIs afatinib and erlotinib in combination with either 0.5  $\mu\text{M}$  crizotinib, 0.5  $\mu\text{M}$  trametinib or 5  $\mu\text{M}$  vemurafenib that guarantee progression free tumor reduction for any HGF- or HGF+ initial tumor subpopulations according to the model, measured by the minimum concentration of erlotinib or afatinib that results in exponential stability of the evolutionary dynamics model (SI, Section 3.2). (C) Simulations of the lung adenocarcinoma model for combinations of 0.5  $\mu\text{M}$  afatinib+0.5  $\mu\text{M}$  trametinib and 1.5  $\mu\text{M}$  erlotinib+0.5  $\mu\text{M}$  crizotinib for the HGF- and HGF+ tumors specified. (D) (Left) Simulations of the evolutionary dynamics of different HGF- lung adenocarcinoma initial tumor subpopulations with a constant treatment of 0.7  $\mu\text{M}$ , 0.5, 0.3 or 0.1  $\mu\text{M}$  afatinib in combination with 0.5  $\mu\text{M}$  of trametinib (red) and of different HGF+ lung adenocarcinoma initial tumor subpopulations with a constant treatment of 8.32  $\mu\text{M}$ , 3.2  $\mu\text{M}$ , 1.5  $\mu\text{M}$  or 0.75  $\mu\text{M}$  erlotinib in combination with 0.5  $\mu\text{M}$  crizotinib (blue). (Right) Maximum eigenvalue decompositions (SI, Section 3.2) classify which subpopulations can lead to progression at different concentrations of EGFR TKI for the afatinib+trametinib combination and the erlotinib+crizotinib combination.

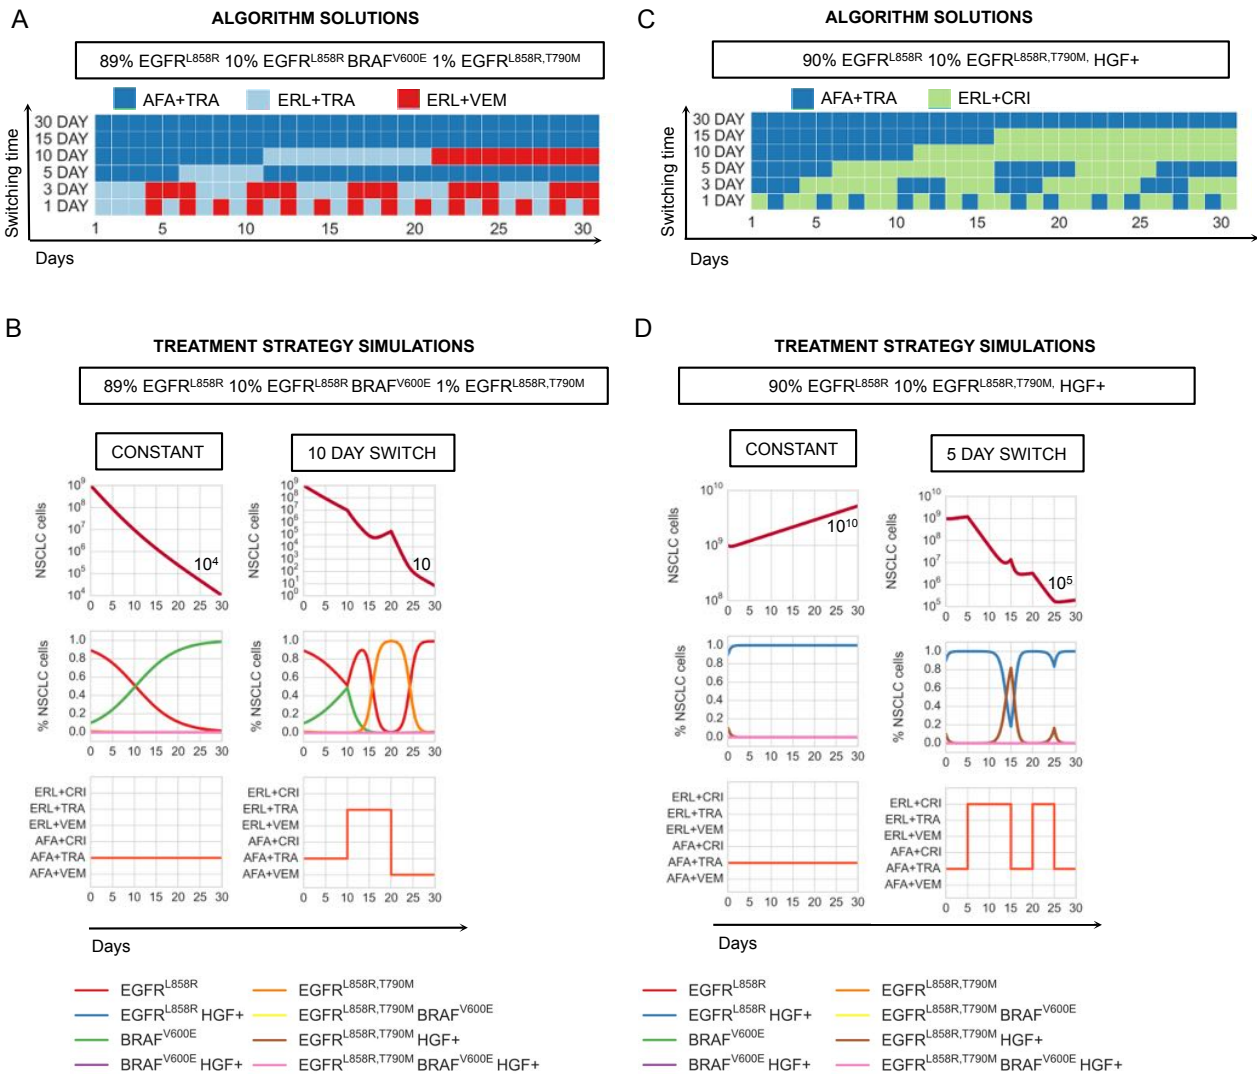

Figure 5: Optimal drug scheduling strategies solved by Algorithm 1 (SI, Section 2.2) for representative initial tumor cell distributions (A),(C), for a 30 day timeframe and 30, 15, 10, 5, 3 and 1 day minimum switching horizons, give one EGFR TKI, either 1.5  $\mu$ M erlotinib (ERL) or 0.5  $\mu$ M afatinib (AFA) in combination with either 5  $\mu$ M vemurafenib (VEM), 0.5  $\mu$ M trametinib (TRA) or 0.5  $\mu$ M crizotinib (CRI) and corresponding simulations (B),(D) of the lung adenocarcinoma evolutionary dynamics for a subset of optimal drug scheduling strategies.

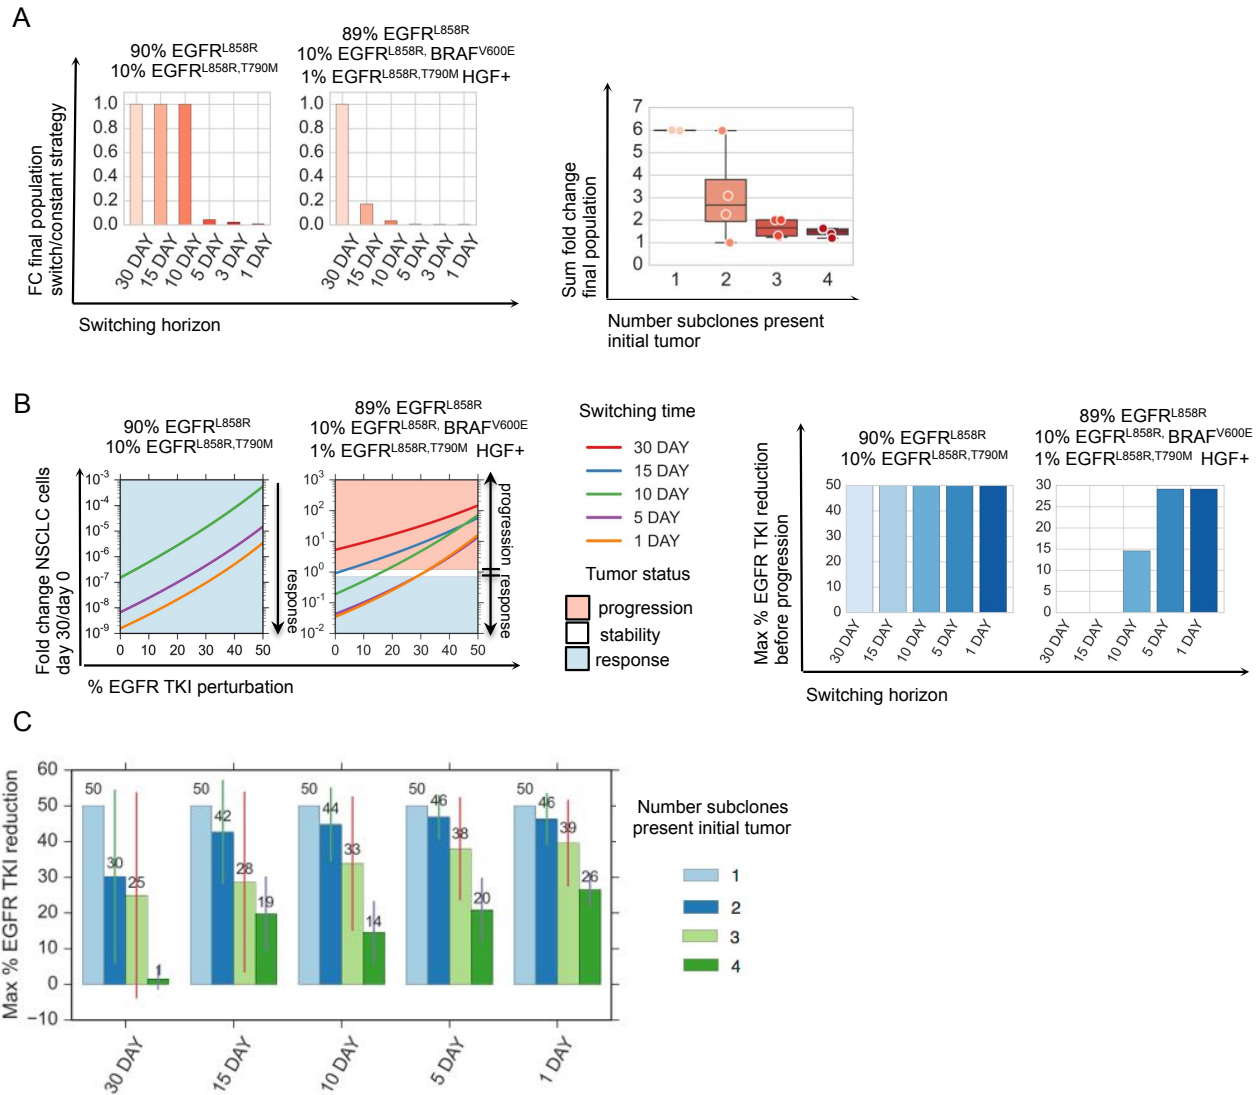

Figure 6: Exploring the robustness of treatment strategies through model simulation. (A) Switching strategies are more beneficial to tumor cell populations with more initial heterogeneity. (Left) Fold change in final lung adenocarcinoma tumor cell populations at day 30 versus day 0 over the course of the optimal 30, 15, 10, 5, 3, and 1 day treatment strategies solved by algorithm 1 (SI, Section 2.2) and normalized by fold change in final tumor cell population for the constant 30 day treatment strategy for an initial tumor cell population comprised of (90% EGFR<sup>L858R</sup>, 10% H1975 EGFR<sup>L858R,T790M</sup>) and another comprised of (89% EGFR<sup>L858R</sup>, 10% BRAF<sup>V600E</sup>, 1% EGFR<sup>L858R,T790M</sup>) subclones. (Right) Sum of fold change for the final lung adenocarcinoma populations (SI, Equation S5) for select initial tumor cell distributions (SI, Table 1) and their corresponding optimal 30, 15, 10, 5, 3, and 1 day treatment strategies, categorized by the number of subclones in the initial tumor cell population. Smaller fold change sums indicate that more switching is beneficial to reduce final populations, whereas larger fold changes indicate that more switching does not necessarily help in reducing the final tumor populations. (B) EGFR TKI dose perturbations. (Left) Fold change in number of lung adenocarcinoma cells between day 30 and day 0, as a function of percent EGFR TKI dose reduction for the optimal 30, 15, 10, 5 and 1 day strategies solved by algorithm 1 (SI, Section 2.2) for tumor cell populations indicated above. The shaded areas indicate the regions of the perturbation space where the treatment strategy reduces the initial tumor cell population by more than 30% (response, light blue), increases the size of the original tumor population size by more than 20% (progression, red), or maintains the original tumor population size between the two (stability, white). (Right) Bar graphs indicate the maximum reduction in EGFR TKI dose supported by the optimal strategy such that there is still reduction in tumor size at day 30 with respect to day 0 for the V600E and the pretreatment MET tumor. (C) The average maximum percent EGFR TKI dose reduction supported before progression for lung adenocarcinoma tumors with different number of initial tumor cell subpopulations and for predicted optimal 30, 15, 10, 5, and 1 day switching strategies.

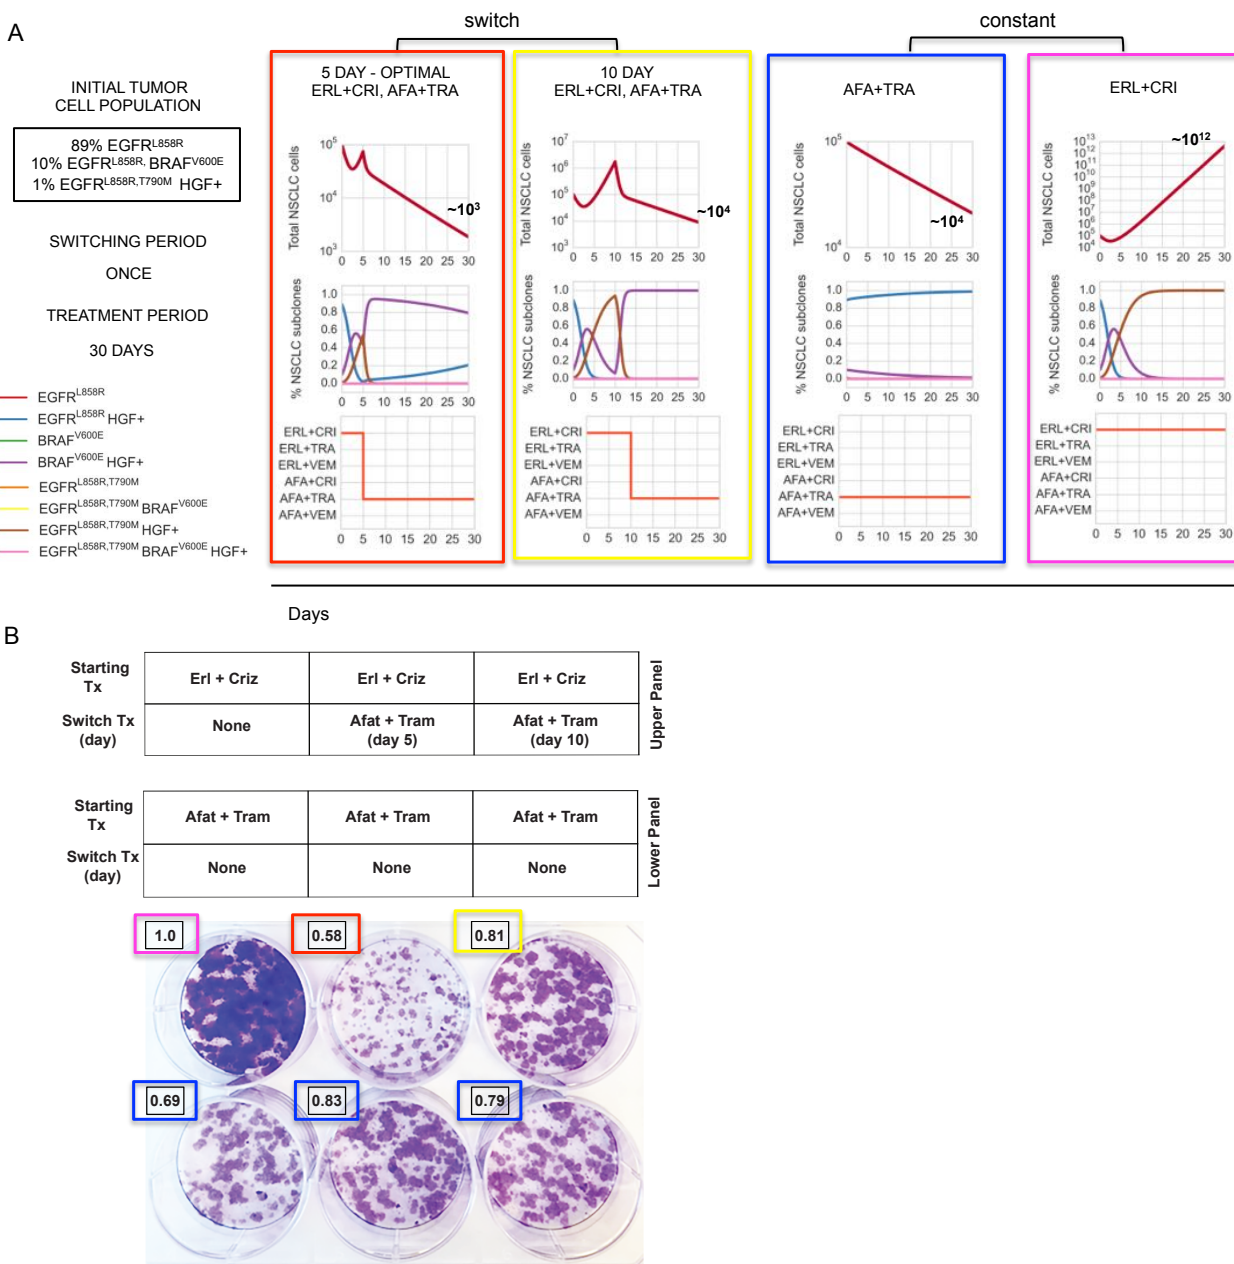

Figure 7: Engineering optimal treatment strategies for concurrent, clonal genetic alterations in EGFR-mutant lung adenocarcinoma and predicting their therapeutic impact. (A) Simulations of the optimal treatment strategy predicted by algorithm 1 (SI, Section 2.2) consisting of 1.5  $\mu\text{M}$  erlotinib+0.5  $\mu\text{M}$  crizotinib for days (0-5) followed by 0.5  $\mu\text{M}$  afatinib+0.5  $\mu\text{M}$  trametinib for days (5-30); the same strategy but with the switch occurring at day 10 and, constant strategies of 0.5  $\mu\text{M}$  afatinib+0.5  $\mu\text{M}$  trametinib or 1.5  $\mu\text{M}$  erlotinib+0.5  $\mu\text{M}$  crizotinib for 30 days, for an initial tumor cell population of 89% EGFR<sup>L858R</sup>, 10% EGFR<sup>L858R</sup>, BRAF<sup>V600E</sup>, 1% EGFR<sup>L858R,T790M</sup>, HGF treated. (B) Evolution experiment shows that the predicted strategy for an initial tumor cell population of 89% EGFR<sup>L858R</sup>, 10% EGFR<sup>L858R</sup>, BRAF<sup>V600E</sup>, 1% EGFR<sup>L858R,T790M</sup>, treated with 50 ng/ml HGF, is optimal. Overlaid numbers indicate the relative cell density of each well at day 30 compared to the erlotinib+crizotinib well (magenta). Computational simulations in (A) show that the predicted optimal strategy has the greatest reduction in tumor cells in vitro (B, red) compared to the same strategy with a 10 day switch (yellow). A simulation of the model predicts that a constant treatment of afatinib+trametinib produces little change in number of tumor cells (B, blue) and that a constant treatment of erlotinib+crizotinib predicts the exponential outgrowth of the initial EGFR<sup>L858R,T790M</sup> MET amplified subpopulation, experimentally validated in (B, magenta).

# Supplementary Information

Vanessa D. Jonsson, Collin M. Blakely, et. al.

## 1 Mathematical Methods

### 1.1 Evolutionary Dynamics Model of NSCLC

The quasispecies model [1] was originally developed to describe the dynamics of populations of self replicating macromolecules undergoing mutation and selection. We choose this model for its relative simplicity and its ability to capture the salient features of the evolutionary dynamics of a simplified generic disease model. The following adaptation incorporates the effects of small molecule inhibitors and describes the growth, mutation and evolution of non small cell lung adenocarcinoma populations:

$$\dot{x}_i = r_i q_{ii} x_i + \sum_{k \neq i}^n r_i q_{ik} x_k - \Psi_i(\ell_k) x_i \quad (\text{S1})$$

where  $x_i \in \mathbb{R}_+$  is the concentration of a NSCLC subpopulation  $i$ ,  $\ell_k \in \mathbb{R}_+$  is a small molecule inhibitor concentration (assumed to remain at constant concentrations throughout),  $r_i$  is the growth rate for each cell  $x_i$ , and  $q_{ik}$  is the probability that cell  $k$  mutates to cell  $i$  (note that  $q_{ii}$  is the probability of no mutation occurring). Finally, the function  $\Psi_i(\ell_k)$  represents the pharmacodynamics of individual drugs  $\ell_k$  or of individual EGFR TKIs (erlotinib or afatinib) in combination with fixed concentrations other small molecule inhibitors used in this study (0.5  $\mu\text{M}$  crizotinib, 0.5  $\mu\text{M}$  trametinib or 5  $\mu\text{M}$  vemurafenib) with respect to the  $i$ -th NSCLC cell type, namely:

$$\Psi_i(\ell_k) = \gamma_{ik} \frac{[\ell_k]^{n_{ik}}}{[\ell_k]^{n_{ik}} + K_{ik}^{n_{ik}}} \quad (\text{S2})$$

where  $\ell_k \in \mathbb{R}_+$  is the drug concentration,  $\gamma_{ik} \in \mathbb{R}_+$  is the saturation coefficient,  $K_{ik} \in \mathbb{R}_+$  is the dissociation constant,  $n_k \in \mathbb{R}_+$  is the Hill coefficient. When  $\ell_k = 0, \forall k \in \{1, \dots, m\}$ , the dynamics are unstable.

## 2 A control theoretic algorithm for designing treatment strategies

To design treatment strategies that best minimize tumor size and control its evolution over time, we combine both a greedy algorithm and receding horizon control approach. We introduce some notation, cost function definitions and specify our algorithm.

### 2.1 Cost functions

To measure the effectiveness of a given treatment strategy over time, we define the *average cost* function. For a given treatment strategy  $\ell_k$  applied to Equation (S1), we rewrite the dynamics of the entire system (i.e., for all cells) as

$$\dot{x} = A(\ell_k)x, \quad (\text{S3})$$

where  $A \in \mathbb{R}^{n \times n}$  is a matrix that represents the growth, mutation and drug dynamics for treatment strategy  $\ell_k$ , for  $n$  cell subpopulations.

The *average cost*  $C_r$  for a time horizon  $N$ , allowable switching period  $\tau$  and time intervals of the form  $[k\tau, (k+1)\tau]$  for  $k = \{0, \dots, N/\tau - 1\}$  is given by

$$C_r = \sum_{k=0}^{N/\tau-1} \int_{k\tau}^{(k+1)\tau} \mathbf{1}^T x(t) dt \quad (\text{S4})$$

where  $\mathbf{1}^T$  is the  $n \times 1$ -dimensional vector of ones and  $x(t)$  is the solution to Equation (S3).

Equation (S4) simplifies to

$$C_r = \sum_{k=0}^{N/\tau-1} \mathbf{1}^T A^{-1} (e^{A\ell_k((k+1)\tau - k\tau)} - I) x(k\tau). \quad (\text{S5})$$

The *final cost*  $C_f$  for an initial tumor population  $x(0)$  and a sequence of drugs  $\{\ell(k)\}_{k=1}^{N/\tau-1}$  that define a switching therapy over a time horizon  $N$  is defined as

$$C_f = e^{A(\{\ell(k)\}_{k=1}^{N/\tau-1})} x(0). \quad (\text{S6})$$

## 2.2 Algorithm

Our algorithm is defined as follows. Given an initial tumor population, denoted by  $x_0$ , a time horizon  $N$  and an allowable switching period  $\tau$ , we perform the following computations to determine a candidate treatment strategy:

---

### Algorithm 1 Treatment strategy synthesis

---

1. **Initialization:** Set  $k = 0$  and  $x(0) = x_0$ .
  2. **Greedy approach:** For time interval  $[k\tau, (k+1)\tau]$ , compute  $y((k+1)\tau) = e^{A(\ell_k)\tau} y(k\tau)$  for each possible treatment strategy  $\ell_k$ .
  3. **Update:** Set  $\ell(k) = \arg \min_{\ell_k} \text{sum}(y(k+1)\tau)$ , and set  $x((k+1)\tau) = \min_{\ell_k} \text{sum}(y(k+1)\tau)$ . Increment  $k$ : if  $k = N$ , proceed to step 4, otherwise return to step 2.
  4. **Output:** A sequence of drugs  $\{\ell(k)\}_{k=1}^{N/\tau-1}$  that define a switching therapy.
- 

The resulting switching therapy  $\{\ell(k)\}$  is then applied until the next biopsy can be taken, giving a new tumor cell population measurement, at which point the algorithm is repeated. In particular, it is important that the horizon  $N$  be chosen to be longer than expected periods between biopsies.

## 3 Model Implementation and Simulations

### 3.1 Derivation of dynamical system parameters

**Growth and Mutation Rates.** We model the growth of NSCLC cell population  $x_i$  by the following ordinary differential equation (ODE):

$$\dot{x}_i = r_i x_i, \quad (\text{S7})$$

where  $r_i$  is the growth rate per day, and  $\dot{x}_i$  denotes the derivative with respect to time of the tumor cell population  $x_i$ . Note that we assume that no mutations occur over the time-frame considered, allowing us to set  $q_{ii} = 1$  and  $q_{ij} = 0$  in the dynamic model (S1), resulting in (S7).

Given an initial population  $x_i(0)$ , the population  $x_i(t)$  on day  $t$  can be obtained by solving ODE (S7), and is specified by the following expression

$$x_i(t) = x_i(0) e^{r_i t}. \quad (\text{S8})$$

Given a set of  $N$  experimental data points  $e_i(0), e_i(t_1), \dots, e_i(t_N)$ , we fit these points to an exponential function of the form (S8), with  $x_i(0) = e_i(0)$  to obtain an experimentally derived value for the growth rate  $r_i$  of tumor cell population  $x_i$ .

We take the DNA mutation rate to be  $1e^{-9}$  mutation/base pair/cell division []. We assume that mutations occur unidirectionally from EGFR<sup>L858R</sup> parental cells to EGFR<sup>L858R,T790M</sup>, EGFR<sup>L858R</sup>, BRAF<sup>V600E</sup> or EGFR<sup>L858R,T790M</sup> BRAF<sup>V600E</sup>, HGF-/+.

**Drug Effect Rates and Hill Functions.** We model the change in a tumor cell population  $x_i$  under a treatment  $j$  of concentration  $\ell$  with the following ordinary differential equation (ODE):

$$\dot{x}_i = r_i x_i - f_i^j(\ell) x_i, \quad (\text{S9})$$

where  $r_i$  is the growth rate per day derived in the previous section and  $f_i^j(\ell)$  is a function mapping the treatment  $j$  at concentration  $\ell$  to a drug effect rate per day. We again assume that no mutation occurs over the time-frame considered, allowing us to set the mutation rates  $q_{ii} = 1$  and  $q_{ij} = 0$  in the model (S1), resulting in (S9).

Similar to the previous section, given an initial population  $x_i(0)$ , the population  $x_i(t)$  on day  $t$  can be obtained by solving ODE (S9), and is specified by the following expression

$$x_i(t) = x_i(0) e^{(r_i - f_i^j(\ell)t)}. \quad (\text{S10})$$

We model the map  $f_i^j(\ell)$  as a modified function of the form

$$f_i^j(\ell) = \gamma_{j,i} \frac{\ell^{n_{j,i}}}{\ell^{n_{j,i}} + K_{j,i}^{n_{j,i}}}, \quad (\text{S11})$$

where  $\gamma_{j,i}$ ,  $n_{j,i}$  and  $K_{j,i}$  are the saturation parameter, Hill function coefficient and binding reaction dissociation constant for drug  $j$  applied to cell  $x_i$ .

Our goal is to obtain values for these three parameters using experimental data measuring cell viability under varying concentrations  $\ell$  of drug  $j$ . In particular, given experimentally obtained data pairs of the form  $\ell, y_{i,j,\ell}(1)$ , where  $y_{i,j,\ell}(1)$  is the ratio of the tumor cell population  $x_i$  treated with concentration  $\ell$  of drug  $j$  at day 1 to the tumor cell population  $x_i$  treated with no drug at day 1. Letting  $x_i^\ell$  denote the treated tumor population and  $x_i^{\text{ctrl}}$  denote the untreated control tumor population, it follows that  $y_{i,j,\ell}$  can be written as

$$y_{i,j,\ell}(1) = \frac{x_i^\ell(1)}{x_i^{\text{ctrl}}(1)} = \frac{x_i(0) e^{(r_i - f_i^j(\ell))}}{x_i(0) e^{r_i}} = e^{-f_i^j(\ell)}, \quad (\text{S12})$$

where the first equality follows from the definition of  $y_{i,j,\ell}(1)$ , the second from applying equations (S10) and (S8) to  $x_i^\ell(1)$  and  $x_i^{\text{ctrl}}(1)$  respectively, and the third from canceling like terms. It follows that the experimentally derived values of  $f_i^j(\ell)$  are given by

$$f_i^j(\ell) = -\ln(y_{i,j,\ell}). \quad (\text{S13})$$

Solving this equation for each experimentally tested concentration  $\ell$ , we obtain a set of points  $\{\ell, f_i^j(\ell)\}$  that can be used to derive the parameters  $\gamma_{j,i}$ ,  $n_{j,i}$  and  $K_{j,i}$  via curve fitting. In order to avoid overfitting, we set  $\gamma_{j,i} = \max_\ell f_i^j(\ell)$ , i.e., we force the modified Hill function to saturate at the maximal experimentally observed rate. Although this approach can be conservative in modeling the drug effect rate of high concentrations of drugs, we note that the maximal dose tested is chosen to be significantly higher than the maximum tolerated doses, and hence we do not expect this saturation to affect the accuracy of our model at clinically relevant doses.

### 3.2 Evolutionary stability measured by maximum eigenvalues

Figures (S7) and ( main text) depict maximum eigenvalue decompositions of HGF- and HGF+ tumors and describe the set of initial NSCLC populations, if present can lead to tumor progression upon initiation of constant (non-switching) combination treatments. For the evolutionary dynamics:

$$\dot{x} = (A - D_\ell)x \quad (\text{S14})$$

where  $x \in \mathbb{R}^n$  is a vector of concentrations of  $n$  NSCLC subpopulations,  $\dot{x} \in \mathbb{R}^n$  is their rate of change over time,  $A \in \mathbb{R}^{n \times n}$  is a matrix that represents the growth and mutation dynamics and  $D_\ell \in \mathbb{R}^{n \times n}$  is a diagonal matrix that represents the corresponding drug effect of one constant drug treatment on the rate of change of NSCLC cells. If all eigenvalues are negative then Equation (S14) is said to be *stable*. In the case of NSCLC evolutionary dynamics corresponding to Equation (1), *stability* refers to tumor reduction, and *instability* refers to tumor progression. In section 3.1, we made the assumption that mutation rates are one directional, hence the  $A$  matrix in Equation (1) is lower triangular and the eigenvalues of  $A - D_\ell$  are exactly equal to its diagonal entries. For each NSCLC subpopulation, we take the maximum eigenvalue for each evolutionary branch downstream of the population and define this as *evolutionary stability*. This maximum eigenvalue represents the worst case stability if the particular population is present upon treatment initiation - a positive maximum eigenvalue indicates that the presence of the cell subpopulation in the tumor upon initiation of treatment is likely to cause therapeutic failure. A negative maximum eigenvalue indicates that the presence of the particular subpopulation will not outgrow or evolve in the presence of therapy.

### 3.3 Robustness analysis

**Sensitivity to drug perturbations.** To analyze the effect of dose reductions on the robustness of constant and switching treatment strategies, we perturbed the drug concentrations and calculated the ratio of final cost and initial cost (Figures (S8)). We rewrite Equation (S1) for one cell  $x_i$  and one drug  $\ell_j$  to illustrate how a drug perturbation  $\delta \in \mathbb{R}^{[0,1]}$  is modeled:

$$\dot{x}_i = r_i q_{ii} x_i + \sum_{k \neq i}^n r_i q_{ik} x_k - \gamma_{j,i} \frac{(\delta \ell)^{n_{j,i}}}{(\delta \ell)^{n_{j,i}} + K_{j,i}^{n_{j,i}}} x_i \quad (\text{S15})$$

The fold change  $FC_f$  in total population from day 0 to day  $N$  for a sequence of drugs  $\{\ell(k)\}_{k=1}^{N/\tau-1}$  defining a switching strategy over a time horizon  $N$ , and initial tumor population  $x_0 = x(0)$  is calculated by

$$FC_f = \frac{C_f}{\sum x_0} = \frac{e^{A(\{\ell(k)\}_{k=1}^{N/\tau-1})} x_0}{\sum x_0}. \quad (\text{S16})$$

If  $FC_f < 1$ , the treatment strategy  $\{\ell(k)\}_{k=1}^{N/\tau-1}$  is effective for NSCLC populations for the duration of the time horizon  $N$ ,  $FC_f > 1$  indicates progression.

### 3.4 Implementation

The evolutionary dynamics model and simulations were implemented using python, scipy and numpy (versions 3.5.1, 0.17.0, 1.9.3) and pandas version 0.17.0 was used for data parsing. Data fitting for experimentally derived cell growth and drug dose response data was performed with Matlab version 8.3.0.532 using the non linear least squares method.



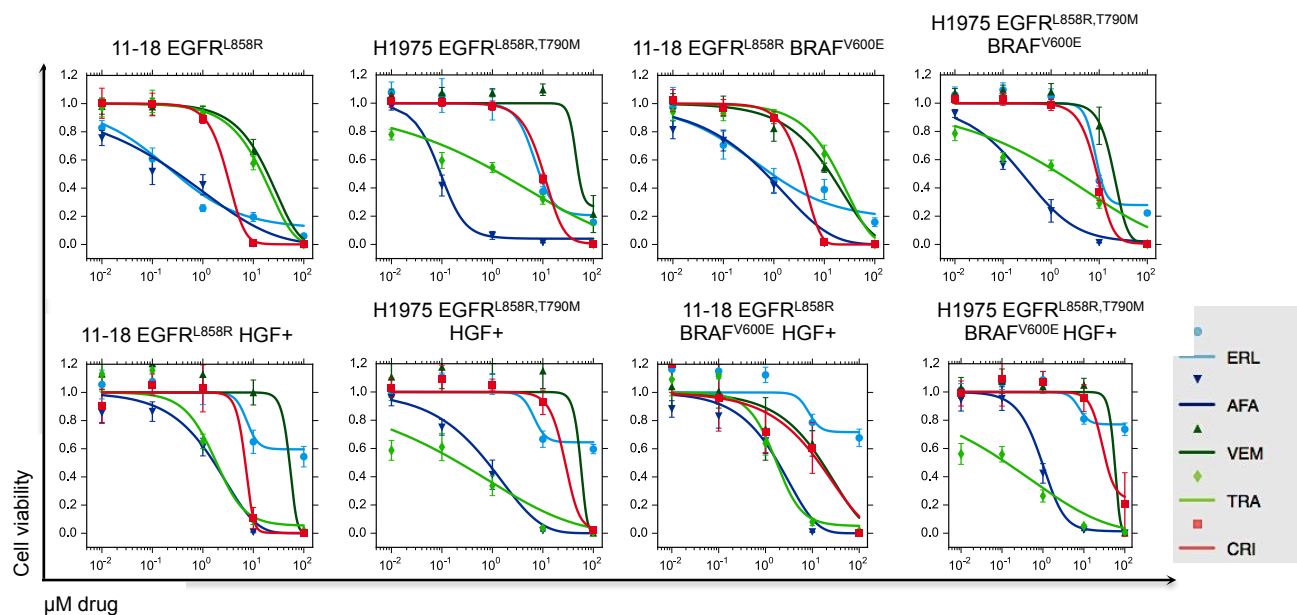

Figure S1: Experimentally derived erlotinib, afatinib, vemurafenib, trametinib and crizotinib dose response curves for 11-18 EGFR<sup>L858R</sup>, 11-18 EGFR<sup>L858R</sup> BRAF<sup>V600E</sup>, H1975 EGFR<sup>L858R,T790M</sup> H1975 EGFR<sup>L858R,T790M</sup> BRAF<sup>V600E</sup> cell lines, and either 0 or 50 ng/ml human growth factor (HGF) and fit with  $\gamma \frac{[\ell]^n}{[\ell]^n + K^n}$  where  $\gamma$  is the maximum inhibition,  $[\ell]$  is the EGFR TKI concentration,  $n$  is the Hill coefficient and  $K$  is the half maximal inhibitory concentration (IC50).

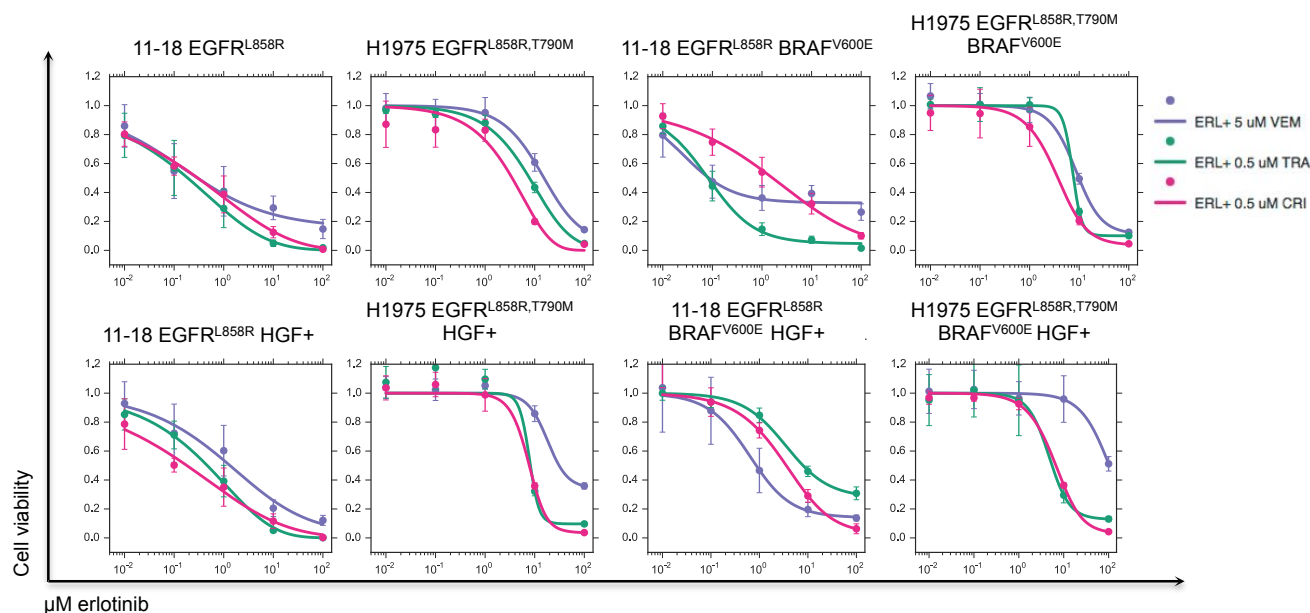

Figure S2: Experimentally derived dose response curves for erlotinib in combination with 5  $\mu\text{M}$  vemurafenib, 0.5  $\mu\text{M}$  trametinib and 0.5  $\mu\text{M}$  crizotinib for 11-18 EGFR<sup>L858R</sup>, 11-18 EGFR<sup>L858R</sup> BRAF<sup>V600E</sup>, H1975 EGFR<sup>L858R,T790M</sup> H1975 EGFR<sup>L858R,T790M</sup> BRAF<sup>V600E</sup> cell lines, and either 0 or 50 ng/ml human growth factor (HGF) and fit with  $\gamma \frac{[\ell]^n}{[\ell]^n + K^n}$  where  $\gamma$  is the maximum inhibition,  $[\ell]$  is the EGFR TKI concentration,  $n$  is the Hill coefficient and  $K$  is the half maximal inhibitory concentration (IC50).

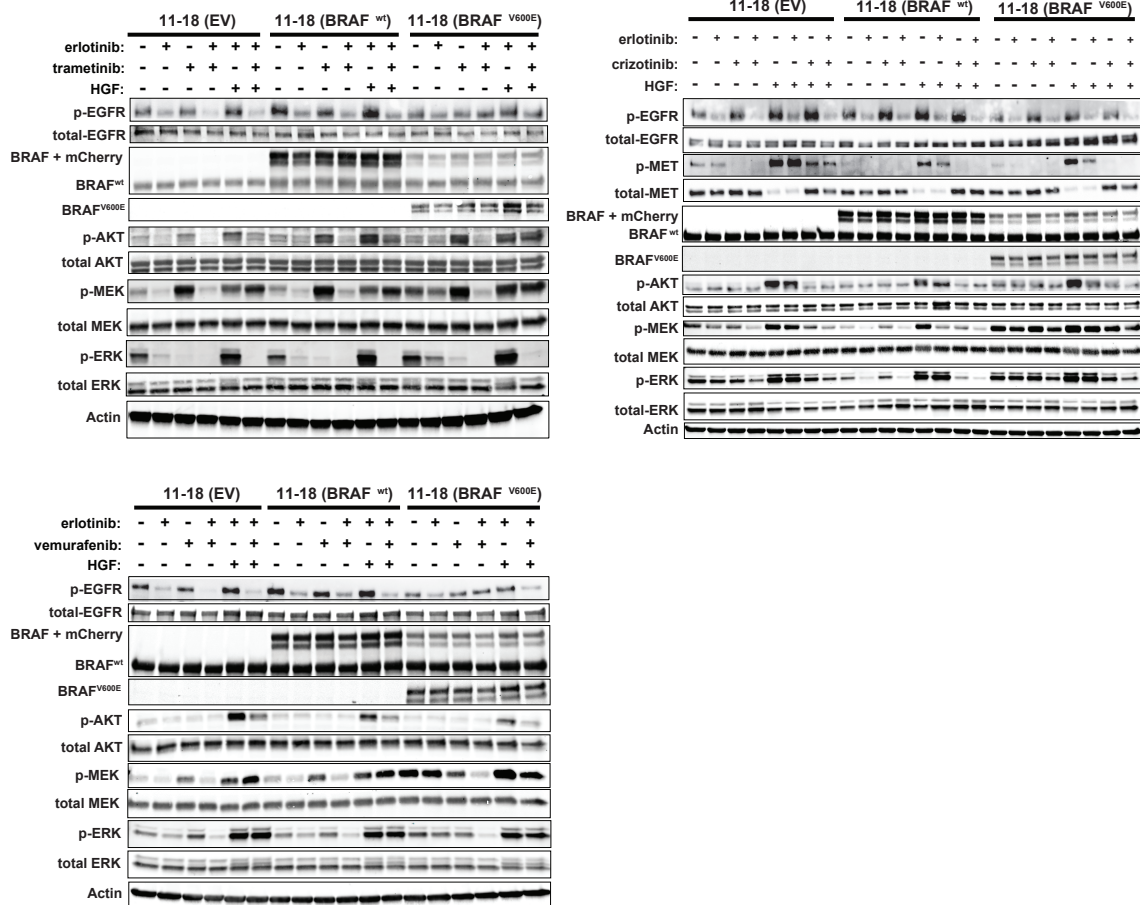

Figure S3: Western blot analysis of cell lysates obtained from 11-18 cell line, treated with drugs and/or HGF as indicated, and probed for the indicated proteins.

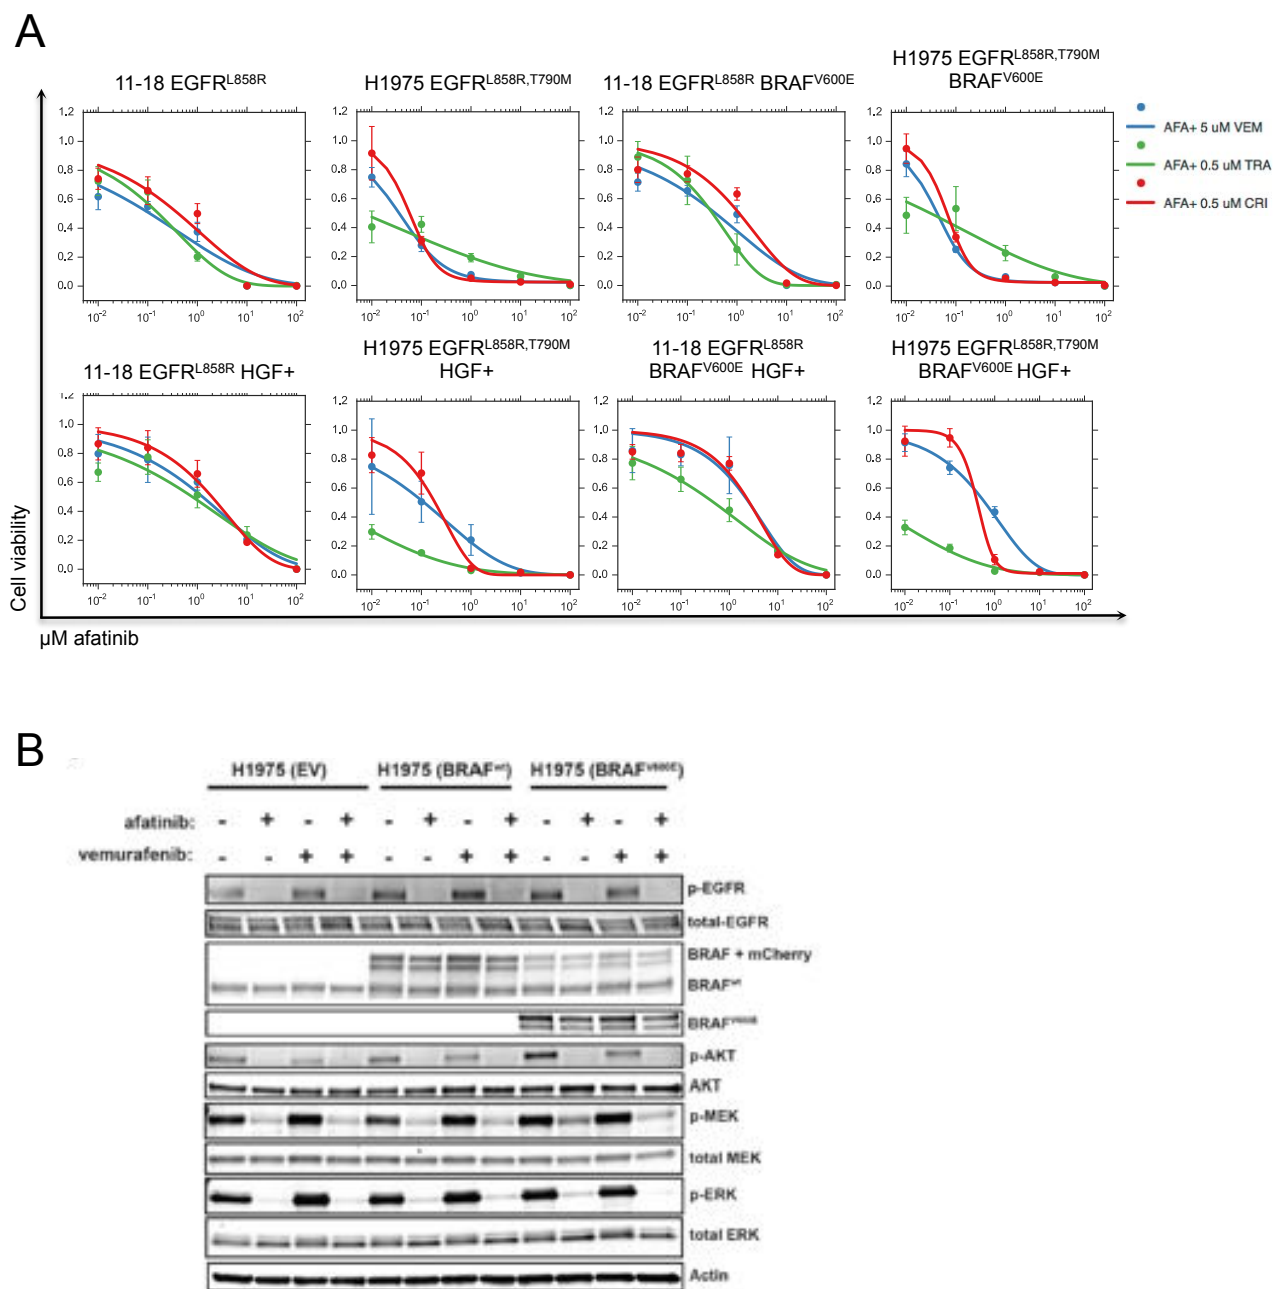

Figure S4: A) Experimentally derived dose response curves for afatinib in combination with 5  $\mu\text{M}$  vemurafenib, 0.5  $\mu\text{M}$  trametinib and 0.5  $\mu\text{M}$  crizotinib for 11-18 EGFR<sup>L858R</sup>, 11-18 EGFR<sup>L858R</sup> BRAF<sup>V600E</sup>, H1975 EGFR<sup>L858R,T790M</sup> H1975 EGFR<sup>L858R,T790M</sup> BRAF<sup>V600E</sup> cell lines, and either 0 or 50 ng/ml human growth factor (HGF) and fit with  $\gamma \frac{[\ell]^n}{[\ell]^n + K^n}$  where  $\gamma$  is the maximum inhibition,  $[\ell]$  is the EGFR TKI concentration,  $n$  is the Hill coefficient and  $K$  is the half maximal inhibitory concentration (IC<sub>50</sub>). (B) Western blot analysis of cell lysates obtained from H1975 cell lines, treated with drugs and/or HGF as indicated, and probed for the indicated proteins.

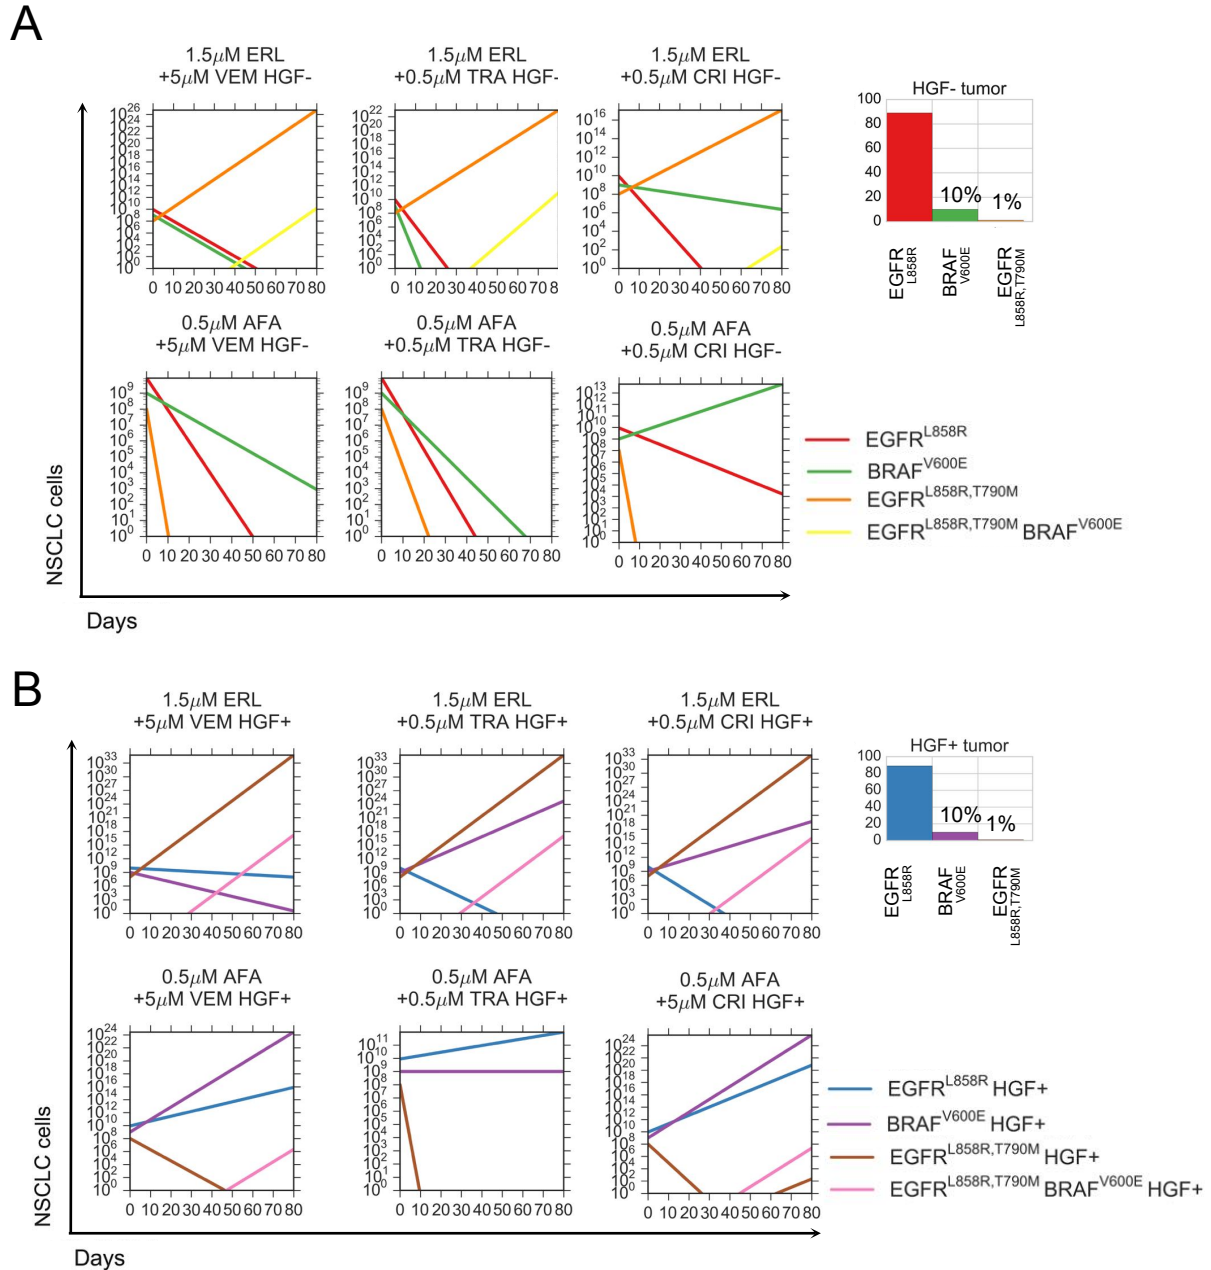

Figure S5: Simulations of the NSCLC model for constant combinations of 0.5  $\mu$ M afatinib or 1.5  $\mu$ M erlotinib with either 0.5  $\mu$ M trametinib, 0.5  $\mu$ M crizotinib or 5  $\mu$ M vemurafenib for a tumor comprised of 89% 11-18 EGFR<sup>L858R</sup>, 10% 11-18 EGFR<sup>L858R</sup>, BRAF<sup>V600E</sup> and 1% H1975 EGFR<sup>L858R T790M</sup>, and treated with HGF (B) or without HGF (A).

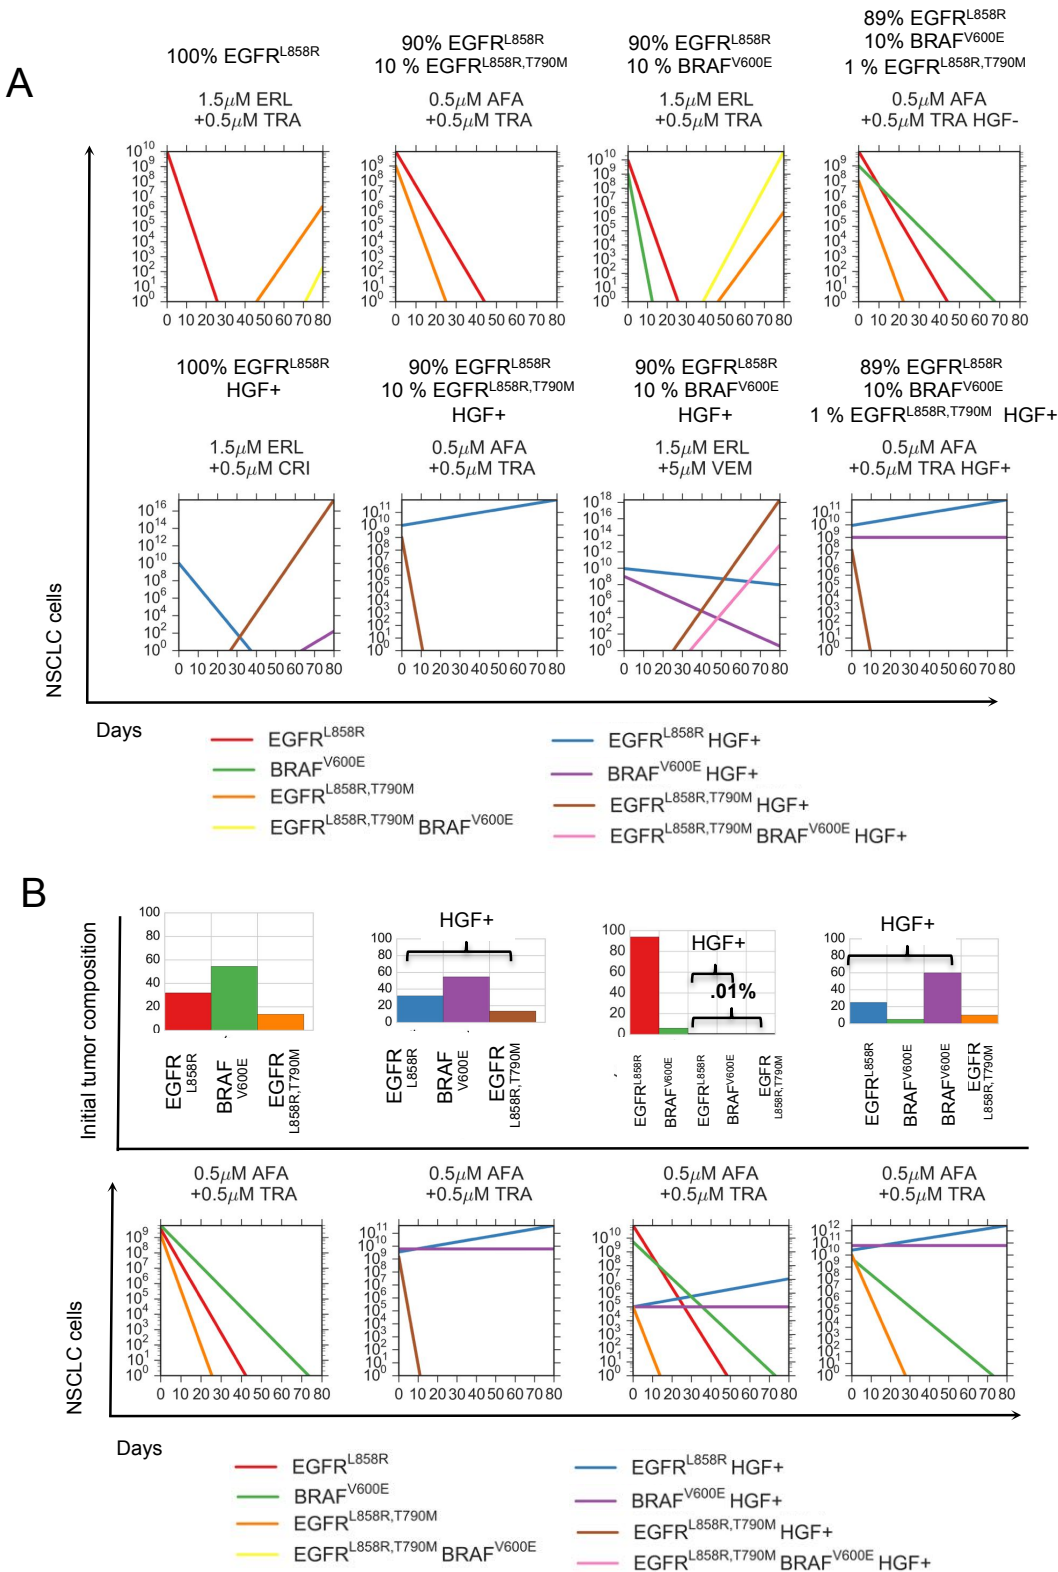

Figure S6: Simulations of the NSCLC model for the optimal 30 day constant combinations found by Algorithm (4) with  $0.5 \mu\text{M}$  afatinib or  $1.5 \mu\text{M}$  erlotinib with either  $0.5 \mu\text{M}$  trametinib,  $0.5 \mu\text{M}$  crizotinib or  $5 \mu\text{M}$  vemurafenib for the relatively low (A) initial tumor heterogeneity or with (B) high initial tumor heterogeneity.

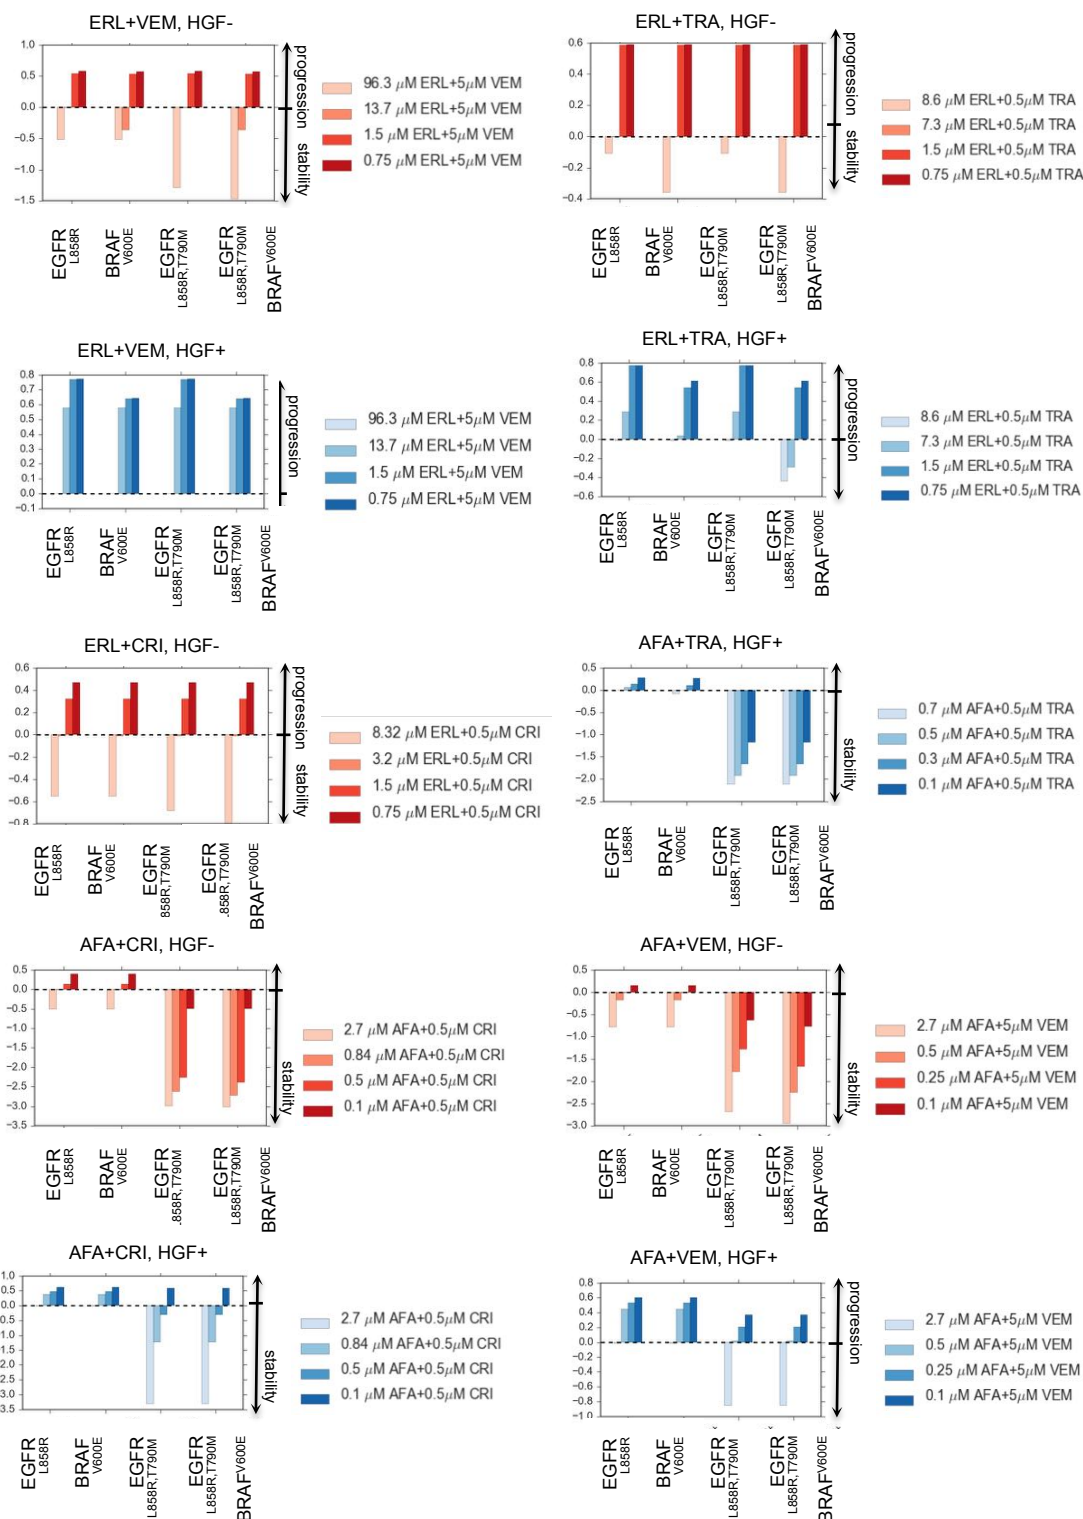

Figure S7: Classification of initial tumor compositions via eigenvalue decompositions describe the initial tumor populations that can destabilize of the evolutionary dynamics in the presence of either erlotinib or afatinib and either 0.5  $\mu$ M trametinib, 0.5  $\mu$ M crizotinib or 5  $\mu$ M vemurafenib.

A

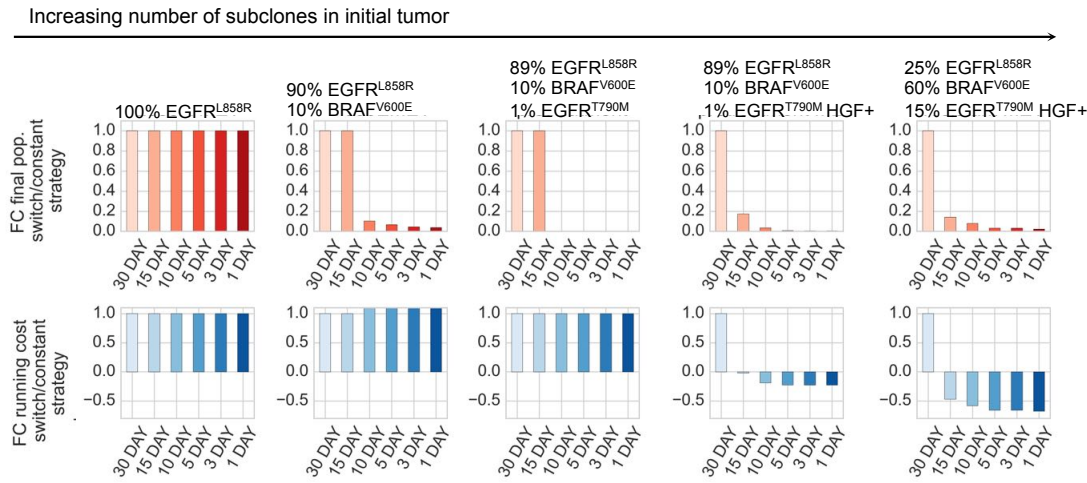

B

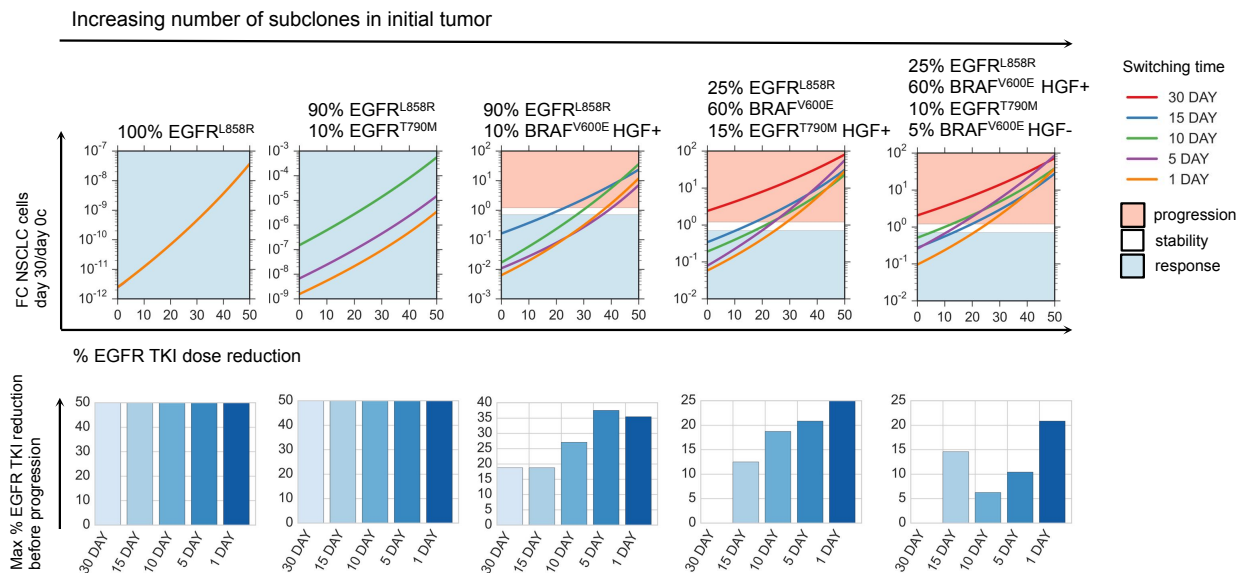

Figure S8: A) Fold change in NSCLC population at day 30 versus day 0, over the course of the optimal 30, 15, 10, 5, 3, and 1 day treatment strategies solved by algorithm 1 (SI), for indicated tumor compositions, normalized by fold change in NSCLC population for the constant 30 day treatment strategy (Red). (Blue) Sum of fold change in the average cost for indicated tumor compositions and corresponding optimal 30, 15, 10, 5, 3, and 1 day treatment strategies. B) (Above) Fold change in number of NSCLC cells between day 0 and day 30, as a function of percent EGFR TKI dose reduction for the optimal 30, 15, 10, 5 and 1 day strategies solved by algorithm 1 (SI) for indicated tumor compositions. Shaded blue areas indicate the region of the perturbation space where the treatment strategy reduces the size of the initial tumor (stable). The shaded red area indicates the region of the perturbation space where the treatment strategy increases the size of the original tumor at day 30 (unstable). (Below) The maximum percent EGFR TKI dose reduction sustainable before the treatment is no longer effective (the tumor progresses).

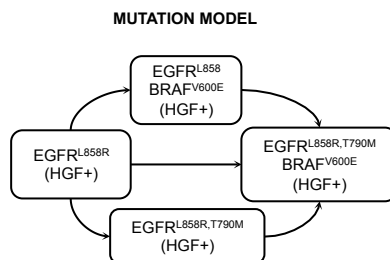

Figure S9: The EGFR-mutant lung adenocarcinoma mutation model used in this study.



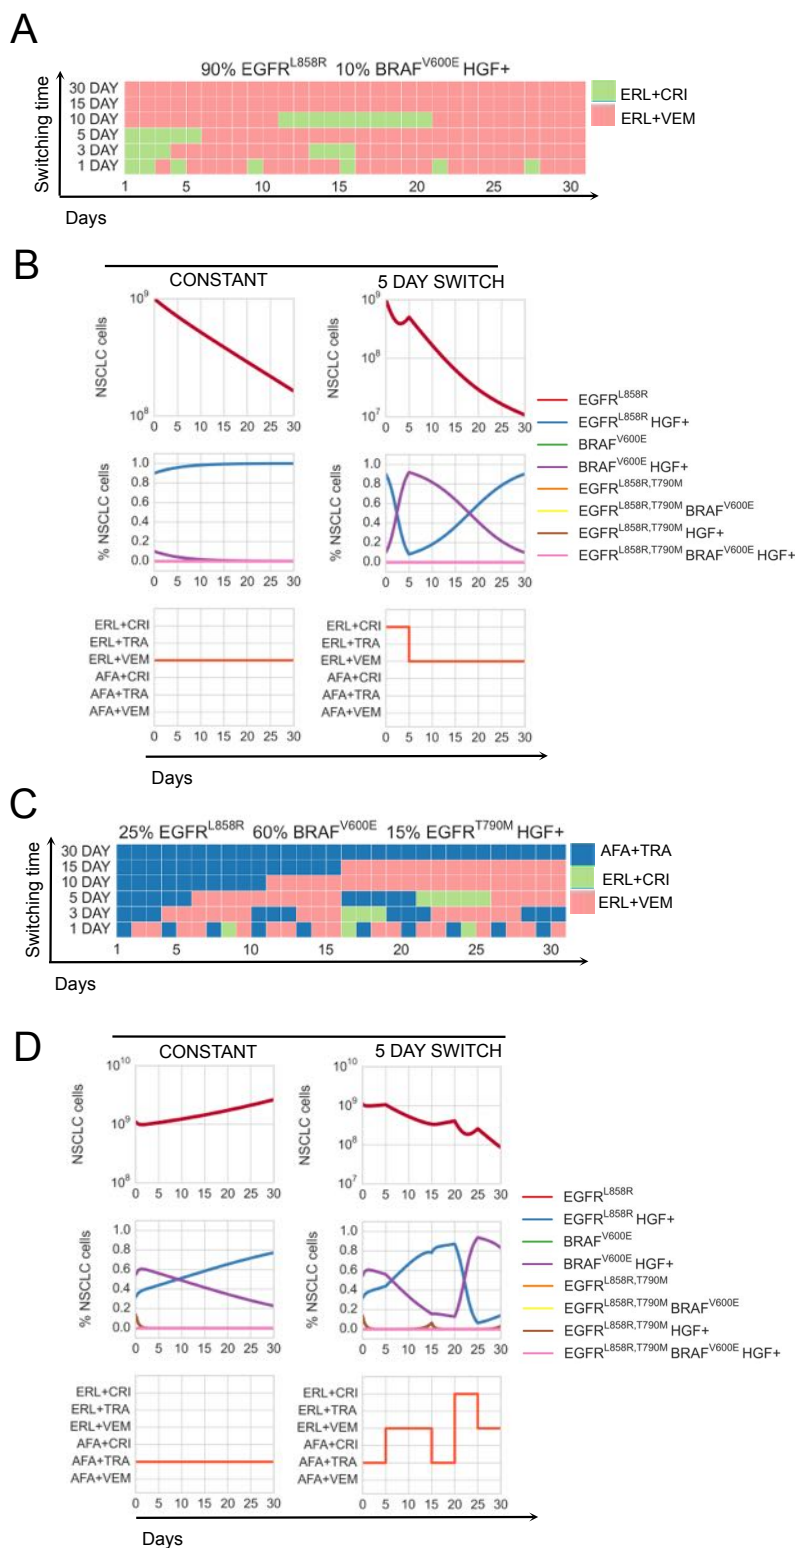

Figure S10: Optimal drug scheduling strategies solved by Algorithm 1 (SI, Section 2.2) for representative initial tumor cell distributions (A),(C), for a 30 day timeframe and 30, 15, 10, 5, 3 and 1 day minimum switching horizons, give one EGFR TKI, either 1.5  $\mu\text{M}$  erlotinib (ERL) or 0.5  $\mu\text{M}$  afatinib (AFA) in combination with either 5  $\mu\text{M}$  vemurafenib (VEM), 0.5  $\mu\text{M}$  trametinib (TRA) or 0.5  $\mu\text{M}$  crizotinib (CRI) and corresponding simulations (B),(D) of the lung adenocarcinoma evolutionary dynamics for a subset of optimal drug scheduling strategies.

| Cell name                                                     | Growth rate, day <sup>-1</sup> |
|---------------------------------------------------------------|--------------------------------|
| 11-18 EGFR <sup>L858R</sup>                                   | 0.58                           |
| 11-18 EGFR <sup>L858R</sup> HGF+                              | 0.67                           |
| 11-18 EGFR <sup>L858R</sup> BRAF <sup>V600E</sup>             | 0.60                           |
| 11-18 EGFR <sup>L858R</sup> BRAF <sup>V600E</sup> HGF+        | 0.70                           |
| H1975 EGFR <sup>L858R, T790M</sup>                            | 0.63                           |
| H1975 EGFR <sup>L858R, T790M</sup> BRAF <sup>V600E</sup>      | 0.59                           |
| H1975 EGFR <sup>L858R, T790M</sup> HGF+                       | 0.77                           |
| H1975 EGFR <sup>L858R, T790M</sup> BRAF <sup>V600E</sup> HGF+ | 0.64                           |

Table 1: Experimentally derived growth rates in parental and engineered 11-18 EGFR<sup>L858R</sup>-positive lung adenocarcinoma cells and treated with or without HGF, fit with Equation (S8).

| Cellname                                                      | IC50 in $\mu\text{M}$ |          |            |            |             |
|---------------------------------------------------------------|-----------------------|----------|------------|------------|-------------|
|                                                               | Erlotinib             | Afatinib | Crizotinib | Trametinib | Vemurafenib |
| 11-18 EGFR <sup>L858R</sup>                                   | 0.19                  | 0.20     | 2.72       | 12.69      | 16.38       |
| 11-18 EGFR <sup>L858R</sup> HGF+                              | 7.93                  | 1.33     | 6.81       | 1.59       | 50.18       |
| 11-18 EGFR <sup>L858R</sup> BRAF <sup>V600E</sup>             | 0.91                  | 0.49     | 3.25       | 15.59      | 10.60       |
| 11-18 EGFR <sup>L858R</sup> BRAF <sup>V600E</sup> HGF+        | 8.74                  | 1.49     | 10.54      | 1.49       | 12.64       |
| H1975 EGFR <sup>L858R, T790M</sup>                            | 7.54                  | 0.08     | 9.33       | 0.76       | 48.31       |
| H1975 EGFR <sup>L858R, T790M</sup> BRAF <sup>V600E</sup>      | 9.32                  | 0.18     | 8.18       | 0.82       | 18.64       |
| H1975 EGFR <sup>L858R, T790M</sup> HGF+                       | 7.04                  | 0.60     | 25.59      | 0.12       | 53.89       |
| H1975 EGFR <sup>L858R, T790M</sup> BRAF <sup>V600E</sup> HGF+ | 7.97                  | 0.82     | 31.83      | 0.06       | 54.48       |

Table 2: Drug sensitivity as measured by the IC50 of erlotinib, afatinib, vemurafenib, trametinib and crizotinib in parental and engineered 11-18 EGFR<sup>L858R</sup>-positive lung adenocarcinoma cells.

| Cell name                                                     | IC50 Erlotinib in $\mu\text{M}$ |                               |                              |
|---------------------------------------------------------------|---------------------------------|-------------------------------|------------------------------|
|                                                               | +0.5 $\mu\text{M}$ Crizotinib   | +0.5 $\mu\text{M}$ Trametinib | +5 $\mu\text{M}$ Vemurafenib |
| 11-18 EGFR <sup>L858R</sup>                                   | 0.30                            | 0.19                          | 0.30                         |
| 11-18 EGFR <sup>L858R</sup> HGF+                              | 0.18                            | 0.47                          | 1.34                         |
| 11-18 EGFR <sup>L858R</sup> BRAF <sup>V600E</sup>             | 1.64                            | 0.08                          | 0.09                         |
| 11-18 EGFR <sup>L858R</sup> BRAF <sup>V600E</sup> HGF+        | 3.58                            | 7.95                          | 0.86                         |
| H1975 EGFR <sup>L858R, T790M</sup>                            | 3.51                            | 7.83                          | 15.39                        |
| H1975 EGFR <sup>L858R, T790M</sup> BRAF <sup>V600E</sup>      | 3.71                            | 7.68                          | 9.86                         |
| H1975 EGFR <sup>L858R, T790M</sup> HGF+                       | 7.78                            | 8.20                          | 31.01                        |
| H1975 EGFR <sup>L858R, T790M</sup> BRAF <sup>V600E</sup> HGF+ | 6.70                            | 5.50                          | 103.67                       |

Table 3: Drug sensitivity as measured by the IC50 of erlotinib in combination with 5  $\mu\text{M}$  vemurafenib, 0.5  $\mu\text{M}$  trametinib and 0.5  $\mu\text{M}$  crizotinib in parental and engineered 11-18 EGFR<sup>L858R</sup>-positive lung adenocarcinoma cells.

| Cell name                                                     | IC50 Afatinib in $\mu\text{M}$ |                               |                              |
|---------------------------------------------------------------|--------------------------------|-------------------------------|------------------------------|
|                                                               | +0.5 $\mu\text{M}$ Crizotinib  | +0.5 $\mu\text{M}$ Trametinib | +5 $\mu\text{M}$ Vemurafenib |
| 11-18 EGFR <sup>L858R</sup>                                   | 0.42                           | 0.17                          | 0.11                         |
| 11-18 EGFR <sup>L858R</sup> HGF+                              | 1.96                           | 0.79                          | 1.27                         |
| 11-18 EGFR <sup>L858R</sup> BRAF <sup>V600E</sup>             | 1.10                           | 0.32                          | 0.37                         |
| 11-18 EGFR <sup>L858R</sup> BRAF <sup>V600E</sup> HGF+        | 2.60                           | 0.48                          | 2.54                         |
| H1975 EGFR <sup>L858R, T790M</sup>                            | 0.06                           | 0.01                          | 0.04                         |
| H1975 EGFR <sup>L858R, T790M</sup> BRAF <sup>V600E</sup>      | 0.07                           | 0.03                          | 0.04                         |
| H1975 EGFR <sup>L858R, T790M</sup> HGF+                       | 0.19                           | 0.00                          | 0.11                         |
| H1975 EGFR <sup>L858R, T790M</sup> BRAF <sup>V600E</sup> HGF+ | 0.41                           | 0.00                          | 0.61                         |

Table 4: Drug sensitivity as measured by the IC50 of afatinib in combination with 5  $\mu\text{M}$  vemurafenib, 0.5  $\mu\text{M}$  trametinib and 0.5  $\mu\text{M}$  crizotinib in parental and engineered 11-18 EGFR<sup>L858R</sup>-positive lung adenocarcinoma cells.

| Cell name                                                    | Erlotinib |      |      | Afatinib |      |           |
|--------------------------------------------------------------|-----------|------|------|----------|------|-----------|
|                                                              | $\gamma$  | n    | K    | $\gamma$ | n    | K         |
| 11-18 EGFR <sup>L858R</sup>                                  | 2.59      | 0.54 | 1.22 | 73.45    | 0.32 | 424540.00 |
| 11-18 EGFR <sup>L858R</sup> HGF+                             | 0.61      | 3.81 | 7.93 | 1885.80  | 0.70 | 106610.00 |
| 11-18 EGFR <sup>L858R</sup> BRAF <sup>V600E</sup>            | 1.72      | 0.53 | 1.90 | 297.20   | 0.46 | 269500.00 |
| 11-18 EGFR <sup>L858R</sup> BRAF <sup>V600E</sup> HGF+       | 0.39      | 3.48 | 8.74 | 590.76   | 0.72 | 18112.00  |
| H1975 EGFR <sup>L858R,T790M</sup>                            | 1.87      | 2.23 | 9.54 | 3.77     | 1.49 | 0.22      |
| H1975 EGFR <sup>L858R,T790M</sup> BRAF <sup>V600E</sup>      | 1.50      | 3.86 | 9.70 | 5.14     | 0.62 | 3.67      |
| H1975 EGFR <sup>L858R,T790M</sup> HGF+                       | 0.52      | 3.67 | 7.04 | 250.96   | 0.56 | 21189.00  |
| H1975 EGFR <sup>L858R,T790M</sup> BRAF <sup>V600E</sup> HGF+ | 0.31      | 3.50 | 7.97 | 5.14     | 1.26 | 3.57      |

Table 5: Differential equation parameters derived using Equation (S11), corresponding to experimentally derived dose response curves of erlotinib and afatinib for parental and engineered 11-18 EGFR<sup>L858R</sup>-positive lung adenocarcinoma cells.

| Cell name                                                    | Crizotinib |      |           | Trametinib |      |            | Vemurafenib |      |           |
|--------------------------------------------------------------|------------|------|-----------|------------|------|------------|-------------|------|-----------|
|                                                              | $\gamma$   | n    | K         | $\gamma$   | n    | K          | $\gamma$    | n    | K         |
| 11-18 EGFR <sup>L858R</sup>                                  | 8.80       | 1.84 | 10.36     | 207.05     | 0.94 | 5504.20    | 825.97      | 0.95 | 27377.00  |
| 11-18 EGFR <sup>L858R</sup> HGF+                             | 6.14       | 3.89 | 11.57     | 3.47       | 1.29 | 4.67       | 9.81        | 4.42 | 89.86     |
| 11-18 EGFR <sup>L858R</sup> BRAF <sup>V600E</sup>            | 74.60      | 1.59 | 61.34     | 1135.50    | 0.88 | 67225.00   | 672.41      | 0.69 | 236280.00 |
| 11-18 EGFR <sup>L858R</sup> BRAF <sup>V600E</sup> HGF+       | 235.65     | 0.57 | 270080.00 | 3.51       | 1.36 | 4.17       | 229.34      | 0.64 | 104240.00 |
| H1975 EGFR <sup>L858R,T790M</sup>                            | 6.98       | 1.68 | 34.62     | 28.40      | 0.26 | 1064100.00 | 1.56        | 5.88 | 50.20     |
| H1975 EGFR <sup>L858R,T790M</sup> BRAF <sup>V600E</sup>      | 6.52       | 1.99 | 23.88     | 35.42      | 0.28 | 1223700.00 | 6.92        | 2.35 | 47.51     |
| H1975 EGFR <sup>L858R,T790M</sup> HGF+                       | 4.66       | 2.51 | 51.31     | 47.17      | 0.27 | 900880.00  | 9.35        | 4.95 | 89.74     |
| H1975 EGFR <sup>L858R,T790M</sup> BRAF <sup>V600E</sup> HGF+ | 1.69       | 2.79 | 36.20     | 38.13      | 0.25 | 595280.00  | 8.62        | 4.92 | 89.37     |

Table 6: Differential equation parameters derived using Equation (S11), corresponding to experimentally derived dose response curves of crizotinib, trametinib and vemurafenib for parental and engineered 11-18 EGFR<sup>L858R</sup>-positive lung adenocarcinoma cells.

| Cell name                                                    | Erlotinib+0.5 $\mu$ M Crizotinib |      |           | Erlotinib+0.5 $\mu$ M Trametinib |      |           | Erlotinib+5 $\mu$ M Vemurafenib |      |        |
|--------------------------------------------------------------|----------------------------------|------|-----------|----------------------------------|------|-----------|---------------------------------|------|--------|
|                                                              | $\gamma$                         | n    | K         | $\gamma$                         | n    | K         | $\gamma$                        | n    | K      |
| 11-18 EGFR <sup>L858R</sup>                                  | 49.60                            | 0.32 | 215970.00 | 23.91                            | 0.38 | 2057.10   | 1.87                            | 0.45 | 0.96   |
| 11-18 EGFR <sup>L858R</sup> HGF+                             | 13.87                            | 0.31 | 2167.30   | 197.39                           | 0.44 | 180410.00 | 4.03                            | 0.44 | 46.41  |
| 11-18 EGFR <sup>L858R</sup> BRAF <sup>V600E</sup>            | 5.02                             | 0.38 | 204.43    | 3.10                             | 0.77 | 0.41      | 1.11                            | 0.85 | 0.05   |
| 11-18 EGFR <sup>L858R</sup> BRAF <sup>V600E</sup> HGF+       | 3.79                             | 0.75 | 26.45     | 1.28                             | 0.95 | 6.69      | 1.97                            | 0.95 | 1.63   |
| H1975 EGFR <sup>L858R,T790M</sup>                            | 990.17                           | 0.74 | 65062.00  | 6.43                             | 0.80 | 110.13    | 3.01                            | 0.97 | 53.62  |
| H1975 EGFR <sup>L858R,T790M</sup> BRAF <sup>V600E</sup>      | 3.40                             | 1.22 | 11.30     | 2.29                             | 4.29 | 9.33      | 2.20                            | 1.54 | 16.34  |
| H1975 EGFR <sup>L858R,T790M</sup> HGF+                       | 3.37                             | 2.08 | 14.90     | 2.34                             | 4.05 | 10.15     | 1.07                            | 2.12 | 23.25  |
| H1975 EGFR <sup>L858R,T790M</sup> BRAF <sup>V600E</sup> HGF+ | 3.65                             | 1.22 | 21.97     | 2.06                             | 1.76 | 8.08      | 3.04                            | 1.27 | 271.56 |

Table 7: Differential equation parameters as derived using Equation (S11), corresponding to experimentally derived dose response curves of erlotinib in combination with either 0.5  $\mu$ M crizotinib, 0.5  $\mu$ M trametinib or 5  $\mu$ M vemurafenib for parental and engineered 11-18 EGFR<sup>L858R</sup>-positive lung adenocarcinoma cells.

| Cell name                                                     | Afatinib+0.5 $\mu$ M Crizotinib |      |           | Afatinib+0.5 $\mu$ M Trametinib |      |           | Afatinib+5 $\mu$ M Vemurafenib |      |           |
|---------------------------------------------------------------|---------------------------------|------|-----------|---------------------------------|------|-----------|--------------------------------|------|-----------|
|                                                               | $\gamma$                        | n    | K         | $\gamma$                        | n    | K         | $\gamma$                       | n    | K         |
| 11-18 EGFR <sup>L858R</sup>                                   | 102.02                          | 0.36 | 363520.00 | 190.37                          | 0.42 | 116910.00 | 41.09                          | 0.27 | 314410.00 |
| 11-18 EGFR <sup>L858R</sup> HGF+                              | 212.01                          | 0.49 | 209360.00 | 42.67                           | 0.29 | 977910.00 | 66.90                          | 0.36 | 344940.00 |
| 11-18 EGFR <sup>L858R</sup> BRAF <sup>V600E</sup>             | 310.67                          | 0.52 | 132530.00 | 141.93                          | 0.60 | 2315.40   | 101.84                         | 0.35 | 673450.00 |
| 11-18 EGFR <sup>L858R</sup> BRAF <sup>V600E</sup> HGF+        | 1440.80                         | 0.69 | 161180.00 | 54.46                           | 0.31 | 621930.00 | 311.18                         | 0.61 | 57467.00  |
| H1975 EGFR <sup>L858R, T790M</sup>                            | 3.75                            | 1.25 | 0.19      | 19.69                           | 0.18 | 572790.00 | 3.87                           | 0.77 | 0.26      |
| H1975 EGFR <sup>L858R, T790M</sup> BRAF <sup>V600E</sup>      | 3.68                            | 1.44 | 0.18      | 26.30                           | 0.22 | 451080.00 | 3.70                           | 1.07 | 0.17      |
| H1975 EGFR <sup>L858R, T790M</sup> HGF+                       | 1549.80                         | 0.77 | 4033.50   | 14.89                           | 0.24 | 285.48    | 110.87                         | 0.36 | 171470.00 |
| H1975 EGFR <sup>L858R, T790M</sup> BRAF <sup>V600E</sup> HGF+ | 4.59                            | 1.88 | 1.02      | 35.76                           | 0.23 | 34108.00  | 411.18                         | 0.52 | 140300.00 |

Table 8: Differential equation parameters derived using Equation (S11), corresponding to experimentally derived dose response curves of afatinib in combination with either 0.5  $\mu$ M crizotinib, 0.5  $\mu$ M trametinib or 5  $\mu$ M vemurafenib for parental and engineered 11-18 EGFR<sup>L858R</sup>-positive lung adenocarcinoma cells.

## References

- [1] Eigen M, McCaskill J, Schuster P (1989) The molecular quasi-species. *Adv. Chem. Phys* 75:149–263.
